# 1      **A Clock-Driven Neural Network Critical for Arousal**

2

3

4      Benjamin J. Bell<sup>1,2\*</sup>, Qiang Liu<sup>2\*</sup>, Dong Won Kim<sup>3</sup>, Sang Soo Lee<sup>2</sup>, Qili Liu<sup>2</sup>, Ian D.

5 Blum<sup>2</sup>, Annette A. Wang<sup>2</sup>, Joseph L. Bedont<sup>3</sup>, Anna J. Chang<sup>3</sup>, Habon Issa<sup>2</sup>, Jeremiah Y.

6                      Cohen<sup>3</sup>, Seth Blackshaw<sup>3</sup>, and Mark N. Wu<sup>2,3,#</sup>

7

8

9      <sup>1</sup>McKusick-Nathans Department of Genetic Medicine, Johns Hopkins University,

10 Baltimore, MD 21287

11      <sup>2</sup>Department of Neurology, Johns Hopkins University, Baltimore, MD 21205

12      <sup>3</sup>Solomon H. Snyder Department of Neuroscience, Johns Hopkins University, Baltimore,

13 MD 21205

14      \*These authors contributed equally.

15      #Correspondence should be addressed to M.N.W. ([marknwu@jhmi.edu](mailto:marknwu@jhmi.edu))

16

17

18 **Summary**

19 The daily cycling of sleep and arousal states is among the most prominent biological  
20 rhythms under circadian control. While much is known about the core circadian clock<sup>1,2</sup>,  
21 how this clock tunes sleep and arousal remains poorly understood<sup>3</sup>. In *Drosophila*, we  
22 previously characterized WIDE AWAKE (WAKE), a clock-output molecule that  
23 promotes sleep at night<sup>4,5</sup>. Here, we show that the function of WAKE in regulating  
24 circadian-dependent neural excitability and arousal is conserved in mice. *mWake*<sup>+</sup> cells  
25 are found in the suprachiasmatic nucleus (SCN) and dorsomedial hypothalamus (DMH).  
26 *mWake*<sup>DMH</sup> neurons drive wakefulness and exhibit rhythmic spiking, with greater firing  
27 during the night vs the day. Loss of mWAKE leads to increased spiking of *mWake*<sup>+</sup> SCN  
28 and DMH neurons and prominent behavioural arousal, specifically during the night.  
29 Single-cell sequencing, imaging, and patch-clamp experiments reveal that *mWake*<sup>DMH</sup>  
30 neurons constitute a glutamatergic/GABAergic population that projects widely, receives  
31 neuromodulatory input, and acts on neuromodulatory neurons. Strikingly, broad  
32 chemogenetic silencing of *mWake*<sup>+</sup> cells leads to profound loss of behavioural  
33 responsiveness and low amplitude, low frequency electroencephalography waveforms.  
34 These findings suggest that the genetic mechanisms regulating circadian control of sleep  
35 and arousal are conserved across >500 million years of evolution and define a clock-  
36 regulated neural network critical for arousal.

37

38

39

40 **Main**

41 **The function of WAKE is conserved in mammals**

42 We previously identified the clock-output molecule WIDE AWAKE (WAKE) from a  
43 forward genetic screen in *Drosophila*<sup>4</sup>. WAKE modulates the activity of arousal-  
44 promoting clock neurons at night, in order to promote sleep onset and quality<sup>4,5</sup>. The  
45 mammalian proteome contains a single ortholog, mWAKE (also named  
46 ANKFN1/Nmf9), with 56% sequence similarity and which is enriched in the core region  
47 of the master circadian pacemaker suprachiasmatic nucleus (SCN)<sup>4,6</sup> (Fig. 1a, Extended  
48 Data Fig. 1a). To investigate whether the function of WAKE is conserved in mice, we  
49 generated a putative null allele of *mWake* (*mWake*<sup>(-/-)</sup>) using CRISPR/Cas9 (Fig. 1b and  
50 see Methods). As expected, *mWake* expression, as assessed by quantitative PCR and *in*  
51 *situ* hybridization (ISH), was markedly reduced in *mWake*<sup>(-/-)</sup> mice, likely due to  
52 nonsense-mediated decay (Fig. 1c, 1d). Given *mWake* expression in the SCN, we first  
53 examined locomotor circadian rhythms and found that *mWake*<sup>(-/-)</sup> mice exhibit a mild but  
54 non-significant decrease in circadian period length (Extended Data Fig. 1b, 1c). These  
55 results are similar to findings from fly *wake* mutants and mice bearing the *Nmf9* mutation  
56 (a previously identified ENU-generated allele of *mWake*)<sup>4,6</sup>.

57 Because we previously demonstrated that WAKE mediates circadian regulation of  
58 sleep timing and quality in fruit flies<sup>4,5</sup>, we next assessed sleep in *mWake*<sup>(-/-)</sup> mice via  
59 electroencephalography (EEG). Under light:dark (LD) conditions, there was no  
60 difference in the amount of wakefulness, non-rapid eye movement (NREM), or REM  
61 sleep between *mWake*<sup>(-/-)</sup> mutants and wild-type (WT) littermate controls (Extended Data  
62 Fig. 1d). In constant darkness (DD), there is a modest main effect of genotype on  
63 wakefulness ( $P < 0.05$ ) and NREM sleep ( $P < 0.05$ ), and a mild but significant decrease in  
64 REM sleep in *mWake*<sup>(-/-)</sup> mutants (Fig. 1e). Although the amount of wakefulness did not  
65 appreciably differ in *mWake*<sup>(-/-)</sup> mutants compared to controls, there was a change in the  
66 distribution of wakefulness at night; mutants spent more daily time in prolonged wake  
67 bouts, with some (~40%) exhibiting dramatically long (>6 hrs) bouts of wakefulness  
68 (Extended Data Fig. 1e, 1f).

69 Because fly WAKE mainly functions at night and mice (as nocturnal animals) are  
70 generally awake at that time, we reasoned that arousal, and not sleep, may be primarily  
71 affected in *mWake* mutants. Alterations in arousal level can be quantified across different

72 parameters, including sleep/wake behaviour, locomotor activity, and responsiveness to  
73 sensory stimuli<sup>7</sup>. Thus, we next examined baseline homecage locomotor activity  
74 (Extended Data Fig. 2a). *mWake*<sup>(-/-)</sup> mutants were markedly hyperactive during the  
75 subjective night compared to littermate controls, although a mild but significant increase  
76 in locomotor activity was also noted during the subjective day (Fig. 1f, 1g,  
77 Supplementary Video 1). To rule out the possibility of 2<sup>nd</sup> site mutations causing this  
78 phenotype, we examined transheterozygous *mWake*<sup>(Nmf9/-)</sup> mutants, which also  
79 demonstrated robust locomotor hyperactivity during the night, but not during the day  
80 (Fig. 1f, 1g). Similar data were obtained for *mWake*<sup>(-/-)</sup> and *mWake*<sup>(Nmf9/-)</sup> mice under LD  
81 conditions (Extended Data Fig. 2b, 2c). Locomotor activity for heterozygous *mWake*<sup>(+/-)</sup>  
82 mice was not different from littermate controls, and there was a trend for it being reduced  
83 at night, compared to *mWake*<sup>(-/-)</sup> ( $P=0.13$ ) and *mWake*<sup>(Nmf9/-)</sup> ( $P=0.06$ ) (Fig. 1f, 1g). The  
84 variability of the pronounced nighttime locomotor activity in *mWake*<sup>(-/-)</sup> and *mWake*<sup>(Nmf9/-)</sup>  
85 mutants was driven by intense stereotypic circling behaviour in a subset (~30-40%) of  
86 these animals (Supplementary Video 1). Related to this, *mWake* was previously  
87 identified as *Nmf9*, and mutations in this gene were noted to cause circling behaviour,  
88 which was interpreted to be due to deficits in vestibular function<sup>6</sup>. However, the intense  
89 coordinated circling behaviour demonstrated by *mWake* mutants has also been observed  
90 in hyperaroused mice<sup>8-10</sup>. In addition, in our swim tests, *mWake*<sup>(-/-)</sup> and *mWake*<sup>(Nmf9/-)</sup>  
91 mutants swam vigorously without impairment and never had to be rescued from potential  
92 drowning (Supplementary Video 2), which indicates normal vestibular function and  
93 contrasts with the findings of Zhang et al. (2015). Thus, our interpretation is that these  
94 and other phenotypes described for *mWake*<sup>(Nmf9/Nmf9)</sup> mutants stem from their  
95 hyperarousal, although we cannot rule out subtle vestibular dysfunction requiring  
96 specialized testing.

97 In addition to baseline locomotor activity, another measure of arousal is sensory  
98 responsiveness<sup>7</sup>. To characterize this phenotype, we evaluated startle response to an  
99 acoustic stimulus in *mWake*<sup>(-/-)</sup> mutants during the subjective day and subjective night.  
100 *mWake*<sup>(-/-)</sup> mutants exhibited an increased startle response to 100 dB and 110 dB stimuli  
101 during subjective night, but not during the subjective day (Fig. 1h, Extended Data Fig.  
102 2d). To examine provoked locomotor arousal, we performed open-field tests and found  
103 that *mWake*<sup>(-/-)</sup> mutants were hyperactive both during the day and night and, unlike

104 controls, failed to demonstrate habituation (Extended Data Fig. 2e-h). Taken together,  
105 these data suggest that mWAKE mainly acts to suppress arousal at night, but that specific  
106 provoked conditions can also reveal underlying hyperarousal in *mWake* mutants during  
107 the day.

108 In *Drosophila*, we previously showed that the large ventrolateral (l-LNv)  
109 photorecipient clock neurons in *wake* mutants lose the rhythmicity of their firing at dawn  
110 vs dusk. This phenotype results from an increase in spiking frequency specifically at  
111 night in the mutants, which is likely due to a reduction in GABA sensitivity in these  
112 clock neurons<sup>4</sup>. We thus asked whether loss of mWAKE would cause a similar  
113 phenotype in *mWake*<sup>+</sup> clock neurons from the photorecipient core region of the SCN. To  
114 genetically target *mWake*<sup>+</sup> neurons while simultaneously creating a mutant allele, we  
115 generated transgenic mice where exon 5 was replaced with a tdTomato-P2A-Cre cassette,  
116 which should produce a null allele (*mWake*<sup>Cre</sup>) (Fig. 1i). As predicted, this transgene  
117 labels neurons in the core region of the SCN (Fig. 1j), and we further confirmed the  
118 overall fidelity of the expression pattern of this transgene, by comparing it to data from  
119 whole-brain RNAscope ISH labeling of *mWake*<sup>11</sup>. We also assessed locomotor activity  
120 in DD in *mWake*<sup>(Cre/Cre)</sup> animals vs heterozygous controls and found that the homozygous  
121 animals phenocopied the nighttime hyperactivity of *mWake*<sup>(-/-)</sup> and *mWake*<sup>(Nmf<sup>9/-</sup>)</sup> mutants,  
122 arguing that *mWake*<sup>Cre</sup> is a bona fide *mWake* mutant allele (Extended Data Fig. 2i, 2j).

123 Patch-clamp recordings revealed a loss of cycling of spiking frequency in  
124 *mWake*<sup>+</sup> SCN neurons, due to a selective increase in firing rate at night in *mWake*<sup>(Cre/Cre)</sup>  
125 mutants (Fig. 1k, 1l, Extended Data Fig. 3a, Supplementary Table 1). The effect of  
126 mWAKE on neuronal excitability is likely cell-autonomous, as intrinsic excitability of  
127 *mWake*<sup>SCN</sup> neurons in these mutants was increased during the night, but not the day  
128 (Extended Data Fig. 3b, 3c). Also analogous to fly *wake* mutants, recordings from  
129 *mWake*<sup>SCN</sup> neurons revealed a decrease in GABA-evoked current at night in  
130 *mWake*<sup>(Cre/Cre)</sup> mice (Fig. 1m, 1n). This phenotype was also observed in mutants lacking  
131 the core clock protein Bmal1<sup>12</sup>, suggesting that mWAKE and BMAL act in the same  
132 pathway (Extended Data Fig. 3d, 3e). These findings suggest the basic function of  
133 WAKE in clock neurons is shared between flies and mice. However, in contrast to fly  
134 WAKE, mWAKE action in the SCN is not crucial for suppressing arousal. Conditional  
135 knockout of mWAKE in the ventral forebrain, including the SCN, using the *Six3-Cre*

136 driver<sup>13</sup> (*Six3*<sup>(Cre/+)</sup>>*mWake*<sup>(flox/-)</sup> mice) did not alter locomotor activity (Extended Data  
137 Fig. 4a-e). Thus, we next sought to identify the brain region(s) where mWAKE acts to  
138 regulate arousal.

139

#### 140 **mWAKE defines a circadian-dependent arousal circuit in the DMH**

141 Beyond the SCN, mWAKE is expressed in a variety of regions across the brain, such as  
142 other hypothalamic sub-regions (including the dorsomedial hypothalamus/DMH, Fig. 2a,  
143 2b, also see Fig. 3a), areas implicated in arousal, the limbic system, sensory processing  
144 nuclei, and limited regions in the cortex<sup>6,11</sup>. The DMH has previously been implicated in  
145 the circadian regulation of arousal<sup>14-16</sup>, although the specific neurons involved remain  
146 unknown. We thus asked whether *mWake*<sup>DMH</sup> neurons mediate circadian-dependent  
147 arousal. Interestingly, in controls, these neurons had greater spiking frequency during the  
148 night vs the day, which is antiphase to the SCN, but aligned with the active phase of the  
149 nocturnal mouse ( $0.55 \pm 0.10$  Hz at ZT0-2 vs  $1.16 \pm 0.15$  Hz at ZT12-14 in *mWake*<sup>(Cre/+)</sup>,  
150  $P < 0.01$ ). Moreover, this nighttime increase was accentuated in *mWake*<sup>(Cre/Cre)</sup> mutants  
151 (Fig. 2c, 2d, Extended Data Fig. 5a, Supplementary Table 1). Similarly, intrinsic  
152 excitability of *mWake*<sup>DMH</sup> neurons was greater in *mWake*<sup>(Cre/Cre)</sup> mutants during the night,  
153 but not the day (Extended Data Fig. 5b, 5c). These data are consistent with a circadian-  
154 dependent role for *mWake*<sup>DMH</sup> neurons in promoting arousal.

155 To address the function of mWAKE in the DMH, we performed conditional  
156 knockout of mWAKE. We generated a floxed allele of *mWake* (*mWake*<sup>flox</sup>) and  
157 performed stereotaxic injection of an AAV viral vector expressing Cre-recombinase  
158 (AAV-Cre) into the DMH of *mWake*<sup>(flox/flox)</sup> mice (Fig. 2e, 2f, Supplementary Table 2).  
159 Reduction of mWAKE in the DMH led to a significant increase in locomotor activity  
160 during subjective nighttime, compared to their baseline. During the subjective day, there  
161 was a non-significant trend ( $P = 0.08$ ) towards an increase in locomotor activity with  
162 conditional knockout of *mWake* in the DMH. No differences in locomotor activity were  
163 observed in sham-injected controls during the subjective day or night (Fig. 2g). These  
164 findings, coupled with the observation that *mWake* mutants demonstrate increased  
165 spiking of *mWake*<sup>DMH</sup> neurons at night (Fig. 2c, 2d), suggest that these neurons promote  
166 arousal or wakefulness.

167 To test this possibility, we chemogenetically activated these neurons by injecting  
168 an AAV vector carrying Cre-dependent DREADD-hM3Dq (AAV-DIO-DREADD-Gq)<sup>17</sup>  
169 into the DMH of *mWake*<sup>(Cre/+)</sup> mice (Fig. 2h, 2i, Supplementary Table 2). CNO-mediated  
170 activation of *mWake*<sup>DMH</sup> neurons resulted in a substantial increase in locomotor activity,  
171 compared to vehicle-treated animals (Fig. 2j). Moreover, chemogenetic activation of  
172 *mWake*<sup>DMH</sup> neurons markedly increased wakefulness, with concomitant reductions in  
173 NREM and REM sleep (Fig. 2k, 2l, Extended Data Fig. 5d, 5e). We next performed  
174 chemogenetic inhibition of *mWake*<sup>DMH</sup> neurons, by injecting an AAV vector encoding  
175 Cre-dependent DREADD-hM4Di (AAV-DIO-DREADD-Gi) and found no significant  
176 effects on locomotor activity or amount of wakefulness or NREM sleep (Extended Data  
177 Fig. 5f-i, Supplementary Table 2). However, the amount of REM sleep was reduced  
178 following injection of CNO, compared to vehicle alone (Extended Data Fig. 5j). In  
179 contrast, CNO alone administered to sham-injected *mWake*<sup>(Cre/+)</sup> mice did not appreciably  
180 affect locomotor activity or vigilance state (Extended Data Fig. 5k, 5l). Taken together,  
181 these data suggest that *mWake*<sup>DMH</sup> neurons promote arousal and that mWAKE acts to  
182 reduce arousal at night by inhibiting the activity of these neurons at that time.

183 To gain mechanistic insights into how *mWake*<sup>DMH</sup> neurons regulate arousal, we  
184 conducted single-cell RNA sequencing (scRNA-Seq) of FACS-sorted tdTomato<sup>+</sup> cells  
185 from the hypothalami of *mWake*<sup>(Cre/+)</sup> mice (Fig. 3a, Extended Data Fig. 6a, 6b,  
186 Supplementary Table 3). In addition to neurons, there was a significant population of  
187 *mWake*<sup>+</sup> ependymal cells, which were likely overrepresented due to their ability to  
188 survive the dissociation process (Extended Data Fig. 6a). The identity of different  
189 neuronal *mWake*<sup>+</sup> clusters and the spatial location of these clusters were determined by  
190 comparison with a hypothalamic scRNA-Seq database and using specific gene markers  
191 (Extended Data Fig. 6c)<sup>18</sup>. This analysis revealed 11 *mWake*<sup>+</sup> clusters in the  
192 hypothalamus, with a prominent DMH cluster and 5 SCN-specific clusters (Fig. 3a).  
193 Collectively, hypothalamic *mWake*<sup>+</sup> neurons comprised a heterogeneous group, but were  
194 largely GABAergic (most clusters including all SCN clusters) or glutamatergic (DMH  
195 and VMH) (Fig. 3b). We confirmed this observation using RNAscope ISH for the SCN  
196 and DMH (Extended Data Fig. 6d-g).

197 Historically, investigations of the neural basis of arousal have focused on  
198 neuromodulatory circuits, but there is growing recognition that GABAergic and

199 glutamatergic neurons likely form the core substrate for arousal, which is in turn tuned by  
200 neuromodulatory networks<sup>3,19,20</sup>. We thus used our scRNA-Seq dataset to characterize  
201 the repertoire of neuromodulatory receptors in *mWake<sup>DMH</sup>* neurons in the DMH (Fig. 3c).  
202 *mWake<sup>DMH</sup>* neurons express specific noradrenergic, cholinergic, histaminergic, and  
203 orexinergic receptors, and so we conducted rabies virus retrograde tracing (Fig. 3c,  
204 Extended Data Fig. 7a, Supplementary Table 2) from these neurons to evaluate potential  
205 inputs (Extended Data Fig. 7a). We observed significant retrograde labeling of histidine  
206 decarboxylase<sup>+</sup> (HDC) neurons in the tuberomammillary nucleus (TMN) (Extended Data  
207 Fig. 7b). We also found some labeling of orexinergic neurons in the lateral hypothalamus  
208 (LH) and cholinergic neurons in the basal forebrain (BF), as well as rare labeling of  
209 noradrenergic neurons in the locus coeruleus (LC) (Extended Data Fig. 7c-e).

210 To address whether *mWake<sup>DMH</sup>* neurons functionally respond to these  
211 neuromodulators, we performed whole-cell patch-clamp recordings of these neurons from  
212 brain slices of *mWake<sup>(Cre/+)</sup>* mice in the presence or absence of norepinephrine, orexin,  
213 acetylcholine, or histamine (Fig. 3d-f, Extended Data Fig. 7f-h, Supplementary Table 1).  
214 Application of orexin and acetylcholine resulted in a significant elevation in spontaneous  
215 firing rate of *mWake<sup>DMH</sup>* neurons in a cell-autonomous manner (i.e., in the presence of  
216 synaptic blockers) (Fig. 3e, 3f). Norepinephrine increased *mWake<sup>DMH</sup>* neuron spiking  
217 indirectly, consistent with the relative paucity of noradrenergic neurons labeled by  
218 retrograde tracing from *mWake<sup>DMH</sup>* neurons (Extended Data Fig. 7e). In contrast,  
219 administration of histamine directly reduced *mWake<sup>DMH</sup>* neuron firing rate (Extended  
220 Data Fig. 7f-h), which may reflect a relative enrichment of the inhibitory H3 receptor  
221 subtype in these neurons (Fig. 3c).

222 Neurons that comprise arousal-promoting nuclei can either act as local  
223 interneurons or project broadly to influence the activity of multiple brain regions,  
224 including the neocortex<sup>21</sup>. To assess which of these categories *mWake<sup>DMH</sup>* neurons  
225 belong to, we injected an AAV vector expressing Cre-dependent eGFP (AAV-FLEX-  
226 eGFP) into the DMH of *mWake<sup>(Cre/+)</sup>* mice and imaged the GFP<sup>+</sup> projections (Extended  
227 Data Fig. 7i, 7j, Supplementary Table 2). *mWake<sup>DMH</sup>* neurons sent projections  
228 throughout the brain, including the BF, caudate/putamen, the corpus callosum, and  
229 regions in the brainstem including the LC. Prior work had suggested that the DMH  
230 region may mediate circadian timing of arousal by modulating LC firing, although the



231 responsible neurons in the DMH were not identified<sup>15</sup>. We therefore asked whether  
232 *mWake*<sup>DMH</sup> neurons can regulate the activity of noradrenergic LC neurons. We injected  
233 an AAV vector encoding a Cre-dependent Channelrhodopsin2 (AAV-DIO-hChR2) into  
234 the DMH of *mWake*<sup>(Cre/+);TH-GFP</sup> mice and then performed whole-cell patch-clamp  
235 recordings from noradrenergic *NE*<sup>LC</sup> neurons following blue-light stimulation of the  
236 terminals of *mWake*<sup>DMH</sup> neurons in the LC (Fig. 3g, Supplementary Table 2). In the  
237 majority of cases, optogenetic activation of *mWake*<sup>DMH</sup> triggered noradrenergic *NE*<sup>LC</sup>  
238 excitatory post-synaptic currents (EPSCs) and spiking (Fig. 3h-j). In summary, our  
239 findings suggest that glutamatergic *mWake*<sup>DMH</sup> neurons are arousal-promoting, project  
240 widely, and bidirectionally interact with neuromodulatory networks.

241

#### 242 **The *mWake*<sup>+</sup> network is critical for arousal**

243 Whether there is a “core substrate” for arousal is controversial, as silencing of various  
244 genetically-defined arousal-promoting neural circuits, either alone or in combination,  
245 generally leads to relatively mild phenotypes<sup>22-27</sup>. Recent models suggest that if core  
246 arousal networks exist, they may be glutamatergic or GABAergic in nature, rather than  
247 the classically-studied monoaminergic or cholinergic systems<sup>19</sup>. Moreover, emerging  
248 data suggest that GABA or glutamate-expressing neurons located in or near previously-  
249 defined arousal-associated nuclei are important for regulating arousal<sup>27-31</sup>. Interestingly,  
250 our data suggest that *mWake*<sup>+</sup> neurons are glutamatergic or GABAergic, and we have  
251 recently found that these cells can be found in several regions implicated in arousal (e.g.,  
252 BF, TMN, vIPAG/DR, LH, PB)<sup>3,11,19,20</sup>.

253 We thus hypothesized that mWAKE defines a distributed arousal network.  
254 Because silencing *mWake*<sup>DMH</sup> neurons led to a mild phenotype (Extended Data Fig. 5h-j),  
255 we chose to inhibit the broad *mWake*<sup>+</sup> network. To do this, we crossed transgenic mice  
256 expressing Cre-dependent DREADD-hM4Di (*LSL-Gi*)<sup>32</sup> to *mWake*<sup>(Cre/+)</sup> mice to generate  
257 *mWake*<sup>(Cre/+);LSL-Gi</sup> progeny. We first examined the expression pattern of the  
258 DREADD-hM4Di in these mice by immunostaining and found that it largely  
259 recapitulated the original expression pattern of the *mWake*<sup>(Cre/+)</sup> mice (Extended Data Fig.  
260 8a). We next characterized behavioural and EEG phenotypes of these mice. Within 15  
261 min of CNO treatment, *mWake*<sup>(Cre/+);LSL-Gi</sup> mice exhibited reduced spontaneous  
262 locomotion and exploratory behavior. After ~90 min, we observed a profound decrease

263 in arousal (reduced or minimal responsiveness to gentle touch or acoustic stimuli, with  
264 maintenance of righting reflex) in these mice, which lasted 2-3 hrs (Fig. 4a, 4b;  
265 Supplementary Video 3). Strikingly, EEG analyses of these mice revealed a marked shift  
266 towards low amplitude, slow frequency waveforms following injection of CNO, but not  
267 vehicle control (Fig. 4c-f; Extended Data Fig. 8b, 8c). For all but one animal, both the  
268 behavioural and EEG phenotypes were reproducible and reversible, becoming  
269 indistinguishable from vehicle-injected animals after 24 hrs. However, one CNO-treated  
270 animal died after >24 hrs. These phenotypes were suggestive of a stupor-like state, rather  
271 than sleep, and indeed *mWake*<sup>(Cre/+)</sup>;*LSL-Gi* mice appeared to exhibit a rebound of sleep-  
272 like slow-wave activity after the effects of the CNO dissipated (Fig. 4c; Extended Data  
273 Fig. 8b, 8c). For comparison, we assessed the behavioural and EEG effects of  
274 chemogenetically silencing arousal-promoting HDC<sup>+</sup> (histamine decarboxylase) neurons  
275 by repeating these experiments with *HDC*<sup>(Cre/+)</sup>;*LSL-Gi* mice. CNO treatment of these  
276 mice led to no discernable differences in behavioural responsiveness or EEG spectral  
277 power and amplitude (Extended Data Fig. 8d-h). These data suggest that the *mWake*<sup>+</sup>  
278 network is essential for basic arousal.

279 Our studies of WAKE in flies and mice suggest that the basic function of WAKE  
280 is to reduce arousal at night, by inhibiting the excitability of *mWake*<sup>+</sup> arousal-promoting  
281 neurons at that time<sup>4,5</sup>. Although it is widely accepted that the circadian clock regulates  
282 sleep and arousal, the cellular mechanisms remain unclear. In principle, this process  
283 could be driven by direct action of SCN projections on arousal circuits<sup>14,15,33</sup>, by SCN  
284 release of diffusible substances<sup>34-37</sup>, or by the activity of local clocks in arousal-  
285 promoting nuclei<sup>38</sup>. Our data suggest that mWAKE mediates local clock control of  
286 arousal in the DMH, defining the first such neural circuit in this region at the genetic  
287 level. Moreover, the observations that mWAKE is expressed in or near several arousal-  
288 related regions<sup>11</sup> and that *mWake*<sup>+</sup> neurons can project broadly (Extended Data Fig. 7j)  
289 suggest a new model for clock control of arousal—multi-focal local control, which  
290 allows for flexible modulatory input from environmental or internal state factors, yet also  
291 facilitates coordinated time-dependent regulation throughout the brain. Although many  
292 regions promoting wakefulness have been identified in the mammalian brain<sup>3</sup>, very few  
293 have been shown to be critical for fundamental arousal. One prominent example is the  
294 parabrachial nucleus (PB); large excitotoxic lesions in the PB lead to a coma-like state,

295 with low amplitude, slow oscillations on EEG, a phenotype similar to that seen with  
296 silencing the *mWake*<sup>+</sup> network<sup>39</sup>. For decades, psychologists have proposed the existence  
297 of distinct, but reciprocally connected, substrates for arousal: a “higher-order”  
298 modulatory system and a basal network, required for attention and consciousness<sup>40</sup>. Our  
299 data suggest the possibility that mWAKE marks a basal arousal network that is tuned by  
300 neuromodulatory inputs and under circadian clock control.

301

## 302 **Methods**

### 303 **Animals**

304 All animal procedures were approved by the Johns Hopkins Institutional Animal Care  
305 and Use Committee. All animals were group housed and maintained with standard chow  
306 and water available *ad libitum*. Animals were raised in a common animal facility under a  
307 14:10 hr Light:Dark (LD) cycle. Unless otherwise noted, adult male mice (2-4 months)  
308 were used in all immunohistochemistry, *in situ* hybridization, and behavioural  
309 experiments. All mouse strains were backcrossed to *C57BL/6* at least seven times prior  
310 to use in behavioural experiments. Genotyping was performed either by in-house PCR  
311 and restriction digest assays, or via Taq-Man based rtPCR probes (Transnetyx). The  
312 *mWake*<sup>Nmj9</sup>, *HDC-Cre*, *TH-GFP*, and *Six3-Cre* mice were obtained from B. Hamilton  
313 (University of California, San Diego), A. Jackson (University of Connecticut), A.  
314 McCallion (Johns Hopkins University), and Y. Furuta (Memorial Sloan Kettering Cancer  
315 Center), respectively. *Bmal1*<sup>-</sup> (stock number: 009100), and *LSL-Gi* (stock number:  
316 026219) mice were obtained from The Jackson Laboratory.

317 The *mWake* null mutant allele (*mWake*<sup>-</sup>) was generated by CRISPR/Cas9 genome  
318 editing (Johns Hopkins Murine Mutagenesis Core), using a targeting guide RNA (gRNA:  
319 CGC AGA AGA ATC CTC GCA AT) to the 4<sup>th</sup> exon of *mWake* and a 136 bp  
320 oligonucleotide (AGT GCG GAC TTT CTC TGG CTC CTG TCC GCA GAA GAA  
321 TCC TCG GCG GAA TTC AAT GGG CAC GTT GTT GGT CAT GAT GGC GAT  
322 GTC CAG GGG TGT CAG CCC TTC GCT GTT CGG TGT) containing two 64 bp  
323 homology arms, surrounding an 8 bp insertion (GCGGAATT), which includes an in-  
324 frame stop codon and induces downstream frameshifts. Exon 4 is predicted to be in all  
325 *mWake* splice isoforms. These constructs were injected into the pronucleus of *C57BL/6J*  
326 fertilized zygotes and implanted into pseudopregnant females. Pups were assayed for

327 insertion by Sanger sequencing of *mWake* gDNA, and knockdown confirmed via qPCR  
328 and *in situ* hybridization. The conditional *mWake* knockout allele (*mWake<sup>lox</sup>*) was  
329 generated via homologous recombination in hybrid (*129/SvEv* x *C57BL/6*) mouse  
330 embryonic stem cells (Ingenious Targeting Laboratory). In the stem cells, a construct  
331 containing two loxP sites and a Neomycin cassette flanking the 4<sup>th</sup> exon of *mWake* was  
332 integrated into the genomic DNA. These cells were then injected into *C57BL/6J*  
333 blastocysts, and offspring with high agouti content were crossed to flipase (FLP)-  
334 expressing *C57BL/6J* to remove the Neomycin selective marker. Offspring were then  
335 screened via Sanger sequencing to confirm proper insertion of both LoxP loci. A  
336 transgenic mouse line expressing both Cre recombinase and tdTomato in *mWake<sup>+</sup>* cells  
337 (*mWake<sup>Cre</sup>*) was generated via homologous recombination in hybrid (*129/SvEv* x  
338 *C57BL/6*) mouse embryonic stem cells (Ingenious Targeting Laboratory). The knock-in  
339 vector targeted exon 5 of the *mWake* locus and was integrated 21 bp into exon 5,  
340 replacing the remainder of the exon with a *tdTomato-P2A-split Cre-Neo-WPRE-BGHpA*  
341 cassette, which causes frameshifted nonsense mutations downstream, resulting in an  
342 *mWake* loss-of-function allele. Neomycin was excised via crossing to FLP mice, and  
343 offspring sequenced to confirm the inclusion of the whole sequence into the *mWake*  
344 locus.

345

### 346 **Molecular Biology**

347 To quantify *mWake* transcript in the *mWake<sup>(-/-)</sup>* mutant mice, qPCR was performed.  
348 Hypothalami were dissected at ~ZT0, and RNA extracted using Trizol Reagent  
349 (Invitrogen). qPCR was performed using a SYBR PCR master mix (Applied  
350 Biosystems) and a 7900 Real Time PCR system (Applied Biosystems), with the  
351 following primers, which target exon 4: *mWake*-F: 5'-CCC TAA CGG TCA GCT TTC  
352 AAG A-3' and *mWake*-R: 5'-GAC ATG CTC CAT TCC ACT TTG TAC-3'. GAPDH  
353 was used as an internal control. Ct value was compared against regression standard curve  
354 of the same primers. 3 biological replicates were performed.

355

### 356 **Single Cell Sequencing**

357 Seven week old, male *mWake<sup>(Cre/+)</sup>* mice were processed at ~ZT5 for single-cell RNA-  
358 Sequencing (scRNA-Seq). A modified Act-Seq<sup>41</sup> method was used in conjunction with a

359 previously described dissociation protocol<sup>18</sup>, with supplementation of Actinomycin D  
360 during dissociation (45  $\mu$ M) and after final resuspension (3  $\mu$ M), following debris  
361 removal (Debris Removal Solution (130-109-398, MACS Miltenyi Biotec) in between. 1  
362 mm hypothalamic sections between Bregma 0.02 mm (collecting medial and lateral  
363 preoptic area) and Bregma -2.92 mm (beginning of the supramammillary nucleus) were  
364 collected, and 2-3 mice pooled per scRNA-Seq library.

365 Following dissociation, tdTomato<sup>+</sup> cells were flow-sorted using an Aria IIu Sorter  
366 (Becton Dickinson). Between 400 - 1000 cells were flow-sorted per brain. Flow-sorted  
367 cells were pelleted and re-suspended in 47.6  $\mu$ l resuspension media. 1  $\mu$ l of flow-sorted  
368 tdTomato<sup>+</sup> cells were used to quantify % of tdTomato<sup>+</sup> cells with a phase-contrast  
369 microscope. Only samples containing ~99% flow-sorted tdTomato<sup>+</sup> cells were processed  
370 for scRNA-Seq. The remaining 46.6  $\mu$ l were used for the 10x Genomics Chromium  
371 Single Cell system (10x Genomics, CA, United States) using V3.0 chemistry per  
372 manufacturer's instructions, generating a total of 3 libraries. Libraries were sequenced on  
373 Illumina NextSeq 500 with ~150 million reads per library (~200,000 median reads per  
374 cell). Sequenced files were processed through the CellRanger pipeline (v 3.1.0, 10x  
375 Genomics) using a custom mm10 genome (with *tdTomato-P2A-Cre-WPRE-bGH*  
376 sequence). All 3 libraries were aggregated together for downstream analysis.

377 Seurat V3<sup>42</sup> was used to perform downstream analysis following the standard  
378 pipeline, using cells with more than 200 genes and 1000 UMI counts, removing *mWake-*  
379 *tdTomato*<sup>+</sup> ependymal cells and non-*mWake*-cells (~1% of the total cluster composed of  
380 oligodendrocytes and astrocytes) using known markers genes in the initial clustering<sup>18</sup>.  
381 Louvain algorithm was used to generate different clusters, and spatial information (spatial  
382 location of different *mWake-tdTomato*<sup>+</sup> clusters across hypothalamic nuclei) and identity  
383 of neuronal clusters were uncovered by referring to a hypothalamus scRNA-Seq  
384 database<sup>18</sup>. Region-specific transcription factors expressed in *mWake*<sup>+</sup> neurons were used  
385 to train *mWake*-scRNA-Seq. Spatial information of different *mWake* neuronal  
386 populations were further validated by matching to the Allen Brain Atlas ISH data using  
387 cocoframer<sup>43</sup>, as well as matching to known *mWake* neuronal distribution across the  
388 hypothalamus<sup>32</sup>. The percentage of GABAergic (*Slc32a1*<sup>+</sup>) and Glutamatergic  
389 (*Slc17a6*<sup>+</sup>) neurons within each cluster was calculated.

390 Receptors for norepinephrine, dopamine, acetylcholine, histamine and orexin  
391 were identified in the scRNA-Seq dataset, and the normalized gene expression within  
392 cluster 4 (DMH) was calculated. scRNA-seq data from this study are accessible through  
393 GEO Series accession number GSE146166.

394

### 395 **Behavioural Analysis**

396 Animals were entrained to a 12:12 hr LD cycle for at least 2 weeks before any locomotor  
397 or EEG-based behavioural experiments.

398

399 Homecage locomotor activity: Animals were separated into new individual cages with  
400 access to food and water *ad libitum* and allowed to acclimate for 4 days before data  
401 collection. Data were recorded over 2 days of 12:12 hr LD and 2 days of constant  
402 darkness (DD) cycles. Locomotor activity was recorded and analyzed using the Opto M3  
403 monitoring system with IR beams spaced 0.5 inch apart and Oxymax data-acquisition  
404 software (Columbus Instruments). Total activity (the total number of beam breaks along  
405 the X and Y axis) was measured in 10 s intervals. Locomotor activity profiles were  
406 generated from the 2<sup>nd</sup> day of LD or the 1<sup>st</sup> day of DD.

407

408 Wheel-running activity: Adult male mice (3-5 months) were placed into individual  
409 cages with a vertical running wheel (ActiMetrics) and *ad libitum* access to food and  
410 water. After 1 week of acclimatization in wheel-cages under 12:12 hr LD conditions, 2  
411 weeks of LD wheel-running activity were recorded, followed by 2 weeks of free-running  
412 activity in DD. Wheel-running data were acquired in 1 min bins and analyzed using  
413 ClockLab software (ActiMetrics). Period estimates were calculated using data from 12  
414 days of DD.

415

416 Open Field Test (OFT): OFT were conducted in 9 x 11 inch polyethylene cages using the  
417 Opto M3 beam-break setup described above. Auto-Track software (Columbus  
418 Instruments) was used to record the X-Y position, distance, and speed of each mouse at  
419 10 Hz frequency. During the 3 hr test, animals were in constant darkness without  
420 bedding, food, or water. Each animal was placed in the arena at the indicated time point,  
421 and total activity and distance traveled were summed in 5 min bins as readouts.

422 Behavioural data were analyzed using a custom MATLAB (Mathworks) program.  
423 Habituation was calculated by summing the total distance of the first 30 min of the trial  
424 and comparing it to the total distance of the final 30 min of each trial.

425

426 Acoustic Startle: Acoustic startle response was recorded using an SR-LAB Startle  
427 Response System (San Diego Instruments) apparatus, which consists of a sound-isolating  
428 cabinet containing a pressure-sensitive plate. Mice were placed into a plexiglass tube  
429 (I.D. 5 cm) and then enclosed inside the chamber on the pressure-recording plate for the  
430 duration of the trial. Mice were acclimated to the test environment, including 50 dB of  
431 background white noise, for 5 min before trials began. Each trial consisted of a 20 ms  
432 white noise stimulus (100 dB, 110 dB, or 120 dB) presented from a speaker 20 cm above  
433 the mouse's head. The response of the animal in the 100 ms afterwards was recorded as  
434 vibration intensity on the pressure platform (in millivolts, mV);  $V_{avg}$  was the total  
435 activity averaged over the recorded window, while  $V_{max}$  was the peak response  
436 intensity. All three trial tones were repeated 5 times throughout the experiment, in a  
437 pseudorandom order and separated by pseudorandom inter-trial intervals (13-17  
438 s). Trials with significant vibration 100 ms before the tone were excluded from the  
439 analysis (<5 instances).

440

441 Behavioural assessment of reduced arousal: *mWake<sup>Cre/+</sup>*; *LSL-Gi* mice were assessed 90  
442 min after IP injection of vehicle or 0.3 mg/kg CNO. Behaviour was scored by a blinded  
443 investigator, and each mouse classified as "Normal," "Reduced Reactivity," or  
444 "Stuporous," based on the individual's spontaneous behaviour and response to gentle  
445 handling. "Normal" mice spontaneously explored the environment and briskly responded  
446 to stimulation. "Reduced Reactivity" mice were generally immobile, but would try to  
447 evade handling. "Stuporous" mice did not exhibit spontaneous locomotion, and had a  
448 minimal response to handling. All animals exhibited righting reflex.

449

#### 450 **Electroencephalography (EEG)**

451 Surgery: 8-10 week old male mice were anesthetized to surgical depth with a  
452 ketamine/xylazine mixture (100 mg/kg and 10 mg/kg, respectively), and all fur was  
453 removed from the top of the head. A skin incision was made along the top of the skull in

454 the rostral-caudal direction, and the scalp was cleaned and connective tissue removed.  
455 The 3-channel EEG headmount (Pinnacle Technology) was aligned with the front 3 mm  
456 anterior to the bregma and glued to the top of the skull. Four guideholes were hand-  
457 drilled, and screws inserted to attach the headmount. EMG wires were then inserted into  
458 the left and right neck muscles. After skin closing, the headmount was sealed to the skull  
459 using dental cement. All animals recovered from surgery for > 5 days before being  
460 affixed to the EEG recording rigs.

461

462 EEG Recording: Sleep behavioural data were obtained using the Pinnacle Technology  
463 EEG/EMG tethered recording system. Following recovery, animals were placed into an  
464 8 in diameter round acrylic cage with lid, provided *ad libitum* food and water, and  
465 tethered to a 100x preamplifier. All mice were housed in a 12:12 hr LD cycle and  
466 acclimated to the cable tethering for  $\geq 5$  days prior to recording. EEG and EMG channels  
467 were sampled at 400 Hz, high-pass filtered at 0.5 Hz for EEG and 10 Hz for EMG,  
468 digitized, and then acquired using Sirena software (Pinnacle Technology).

469

470 Analysis: Mouse sleep was scored visually by one or two trained technicians in Sirenia  
471 Sleep software (Pinnacle Technology), using raw EEG/EMG traces in 10 s epochs. Each  
472 epoch was scored WAKE, NREM, or REM, and epochs with artifacts were marked for  
473 exclusion in further analysis. Animals with severe movement artifacts or poor EEG  
474 waveforms were excluded from all behavioural datasets. Sleep or wake bouts were  
475 identified as >30 s of continuous sleep or wakefulness, respectively. Spectral analysis  
476 was performed using custom MATLAB (Mathworks) programs, and all Fast Fourier  
477 Transform spectra used 1024 or 512 point size and the Welch's power spectral density  
478 estimate. Spectrograms were composed with short-time Fourier transforms with a  
479 window size of 30 s, 60% overlap, and smoothed by a rolling Hann window.

480

### 481 **Stereotaxic surgeries**

482 8-12 week old male mice were anesthetized to surgical depth with a ketamine/xylazine  
483 mixture (100 mg/kg and 10 mg/kg, respectively), and all fur was removed from the top of  
484 the head. The mouse was secured into a Stoelting stereotaxis frame, and the  
485 microinjector tip was placed on the Bregma and all coordinates zeroed. Small (~0.5 mm)



486 craniotomies were performed to allow for virus injection (50-300 nl at ~25 nl/min).  
487 Coordinates, volumes, viruses used and their sources are listed in Supplementary Table 2.  
488 Post-injection, animals were allowed to heal and express viral genes for  $\geq$  two weeks (for  
489 projection and connectivity studies), and  $\geq$  four weeks (for all behaviour and functional  
490 manipulations). If sleep behaviour was measured, EEG headmounts were implanted in a  
491 separate surgery. Locations of all viral injections were confirmed by post-hoc  
492 immunostaining, and no animals were excluded from our analyses.

493

#### 494 **Electrophysiological recordings**

495 Male mice between 5-10 weeks old were deeply anesthetized with isoflurane, and the  
496 brains quickly removed and dissected in oxygenated (95% O<sub>2</sub>, 5% CO<sub>2</sub>) ice-cold slicing  
497 solution (2.5 mM KCl, 1.25 mM NaH<sub>2</sub>PO<sub>4</sub>, 2 mM MgSO<sub>4</sub>, 2.5 mM CaCl<sub>2</sub>, 248 mM  
498 sucrose, 26 mM NaHCO<sub>3</sub> and 10 mM glucose). Acute coronal brain slices (250  $\mu$ m)  
499 were prepared using a vibratome (VT-1200s, Leica) and then incubated in oxygenated  
500 artificial cerebrospinal fluid (ACSF, 124 mM NaCl, 2.5 mM KCl, 1.25 mM NaH<sub>2</sub>PO<sub>4</sub>, 2  
501 mM MgSO<sub>4</sub>, 2.5 mM CaCl<sub>2</sub>, 26 mM NaHCO<sub>3</sub> and 10 mM glucose, 290-300 mOsm) at  
502 28°C for 30 min and then at room temperature for 1 hr. Slices were then transferred to a  
503 recording chamber, continuously perfused with oxygenated ACSF at room temperature  
504 and visualized using an upright microscope (BX51WI, Olympus). Labeled cells of  
505 interest were visualized using infrared differential interference contrast (IR-DIC) and  
506 native fluorescence. Glass electrodes (5-8 M $\Omega$ ) were filled with the following internal  
507 solution (130 mM K-gluconate, 5 mM NaCl, 10 mM C<sub>4</sub>H<sub>8</sub>N<sub>3</sub>O<sub>5</sub>PNa<sub>2</sub>, 1 mM MgCl<sub>2</sub>, 0.2  
508 mM EGTA, 10 mM HEPES, 2 mM MgATP and 0.5 mM Na<sub>2</sub>GTP, pH 7.2-7.3, 300  
509 mOsm). Whole-cell patch clamp recordings were obtained using a Multiclamp 700B  
510 amplifier (Molecular Devices). Data were sampled at 20 kHz, low-pass filtered at 2 kHz,  
511 and digitized using a Digidata 1440A (Molecular Devices).

512 For baseline spontaneous and evoked firing rate measurements, recordings were  
513 performed under current clamp configuration. Baseline recordings were performed for at  
514 least 30 s to measure spontaneous firing rate. To measure evoked firing rate, current  
515 injections from -10 to 100 pA were performed for 600 ms. 0.5% biocytin (wt/wt) was  
516 added to the internal solution to label the recorded cell. Slices were fixed post-

517 experiment in 4% PFA overnight, and then incubated with Alexa488-conjugated  
518 streptavidin (Invitrogen, 1:2000) for 24 hrs, and then imaged on a Zeiss 800 confocal  
519 microscope. For measurement of GABA currents, voltage-clamp recordings at -70 mV  
520 were performed at ZT12-14. K-gluconate in the patch-pipette was replaced with CeCl<sub>2</sub>  
521 for these recordings, CeOH was used to adjust the pH of the internal solution, and TTX  
522 (1 μM) was added to the ACSF to block action potentials. 1 mM GABA was delivered  
523 for 5 s using a Picospritzer III (Parker), and GABA-evoked current was recorded. For  
524 recordings of *mWake<sup>DMH</sup>* neurons, ~30% cells exhibited spontaneous firing, and so  
525 analyses of evoked responses were restricted to this subset of neurons.

526 For application of norepinephrine, orexin, acetylcholine, and histamine, current-clamp  
527 recordings were performed at ZT12-14. Baseline spontaneous activity was recorded for  
528 30 s, and then for another 30 s following continuous application of the neurotransmitter.  
529 Compounds were pre-loaded into pulled glass pipettes (3-4 μm I.D. at the tip) and  
530 delivered at the recorded cell using a Picospritzer III (Parker). The compounds and  
531 concentrations used were as follows: norepinephrine (100 μM), acetylcholine chloride (1  
532 mM), orexin-A (300 nM), and histamine (20 μM). For synaptically isolating recorded  
533 cells, ion channel blockers (20 μM CNQX; 50 μM AP5; 10 μM Picrotoxin) were added to  
534 the ACSF perfusion. For quantification of firing rates for cells reaching plateau potential,  
535 the maximum firing rate observed for any cell following application of the relevant  
536 neurotransmitter was used.

537 For optogenetic experiments, AAV-DIO-hChR2 (Supplementary Table 2) was  
538 injected into the DMH of *mWake<sup>(Cre/+);TH-GFP</sup>* mice. Acute slices were prepared 3  
539 weeks post-viral injection. Current-clamp and voltage-clamp recordings were performed  
540 from norepinephrine-expressing cells in the locus coeruleus (*TH<sup>+</sup>*), in the presence of  
541 optogenetic activation of ChR2-expressing terminals in the LC. Slices were exposed to  
542 blue light (480 nm) from the upper lens for 2 s at different stimulation frequencies (5, 10,  
543 20, and 50 Hz) triggered by the Digidata 1440A.

544

### 545 **Immunohistochemistry**

546 Mice were deeply anesthetized with a ketamine/xylazine mixture then fixed by  
547 transcardial perfusion with 4% paraformaldehyde (PFA). Brains were subsequently

548 drop-fixed in 4% PFA for 24-48 hr and transferred into 1x PBS before being sectioned at  
549 40  $\mu\text{m}$  thickness using a vibratome (VT1200S, Leica). Free-floating sections were  
550 washed in 1x PBS, blocked for 1 hr in blocking buffer (PBS containing 0.25% Triton-X-  
551 100 and 5% normal goat serum or normal donkey serum), then incubated with rabbit anti-  
552 HDC (Progen, 16045, 1:800), goat anti-ChAT (Millipore, AB144P, 1:250), rabbit anti-  
553 orexin A (Abcam, AB6214, 1:500), chicken anti-TH (Abcam, AB76442, 1:1000), or rat  
554 anti-HA (Roche 11867423001, 1:250) in blocking buffer at 4°C overnight. The  
555 following day, slices were washed with PBST (PBS and 0.1% Tween-20), then incubated  
556 with Alexa 488 anti-rabbit (ThermoFisher, A-11008, 1:2500-1:5000), Alexa 568 anti  
557 rabbit (ThermoFisher, A-11011, 1:2500), Alexa 568 anti-goat (ThermoFisher, A11057,  
558 1:2000), Alexa 488 anti-rat (ThermoFisher A-11006, 1:2000), or Alexa 488 anti-chicken  
559 (ThermoFisher, A-11039, 1:2000) secondary antibodies for 2.5 hrs in blocking buffer.  
560 Brain sections were then washed in PBST, incubated in DAPI (1:2000, Millipore) for 5  
561 min, then washed in PBS. Sections were mounted on slides using VECTASHIELD  
562 HardSet Mounting Medium (Vector Laboratories, USA). In all tdTomato images, native  
563 fluorescence of tdTomato was visualized. Images were acquired using a Zeiss LSM800  
564 confocal microscope under 10x-63x magnification.

565

566

### 567 ***In situ* hybridization**

568 ISH for *mWake* was performed as previously described<sup>4</sup>. RNAScope ISH was performed  
569 using the RNAScope 2.5 Chromogenic Assay and the BaseScope™ Detection Reagent  
570 Kit according to the manufacturer's instructions (Advanced Cell Diagnostics (ACD))<sup>44</sup>.  
571 Target probes were designed to exon 4 of *mWake*. Mouse brains were dissected and fresh  
572 frozen in Tissue-Tek O.C.T. (VWR) and cryosectioned at 10  $\mu\text{m}$ . Sections were treated  
573 with hydrogen peroxide and protease, before hybridization to the custom *mWake* probe  
574 and subsequent amplification. Signal was detected by chromogenic reaction with  
575 BaseScope™ Fast RED, and sections counterstained with hematoxylin. Images were  
576 acquired on a Keyence BZ-X700 microscope (Keyence) under 10x brightfield  
577 illumination. Fluorescent *in situ* hybridization (FISH) was performed with the  
578 RNAScope™ Fluorescent Multiplex Assay (ACD), using probes targeting *tdTomato* and  
579 *Slc32a1* (*VGat*) or *Slc17a6* (*VGlut2*) mRNA. Preparation of tissue sections was

580 performed as above, followed by simultaneous hybridization to both probes. Probe  
581 binding was indicated by deposition of target-specific fluorophores at each location via  
582 TSA Plus Fluorescence kit (PerkinElmer), and sections were then counterstained with  
583 DAPI. Sections were imaged on a Zeiss LSM880 confocal at 20x and 63x.

584

### 585 **Designer Receptors Exclusively Activated by Designer Drugs (DREADDs)**

586 DREADD receptors coupled to either Gq or Gi were expressed in a Cre-dependent  
587 fashion in *mWake*<sup>+</sup> neurons of *mWake*<sup>(Cre/+)</sup> mice, either locally in the DMH, via  
588 stereotaxic injection of a viral vector (AAV-DIO-DREADD-Gq or AAV-DIO-  
589 DREADD-Gi) (Supplementary Table 2), or globally via crossing with a transgenic  
590 effector mouse line (*B6N;129-CAG-LSL-HA-hM4Di-mCitrine*, “LSL-Gi”). Clozapine *N*-  
591 oxide (CNO) (SigmaAldrich) was prepared as a stock solution of 50 mg/ml in DMSO,  
592 and then freshly diluted to 0.1 mg/ml in sterile PBS before IP injection. Solution clarity  
593 was monitored throughout dosing, and the solution was warmed to 37°C if precipitates  
594 were observed. Vehicle control was prepared as sterile saline + 0.01% DMSO. All  
595 injections occurred at the same ZT/CT time within each experiment, and all animals were  
596 treated with vehicle or CNO each day in a cross-over design, with ≥2 days recovery  
597 between experimental recording days. To control for CNO activity on its own, 1 or 3  
598 mg/kg CNO were IP injected into sham-injected *mWake*<sup>(Cre/+)</sup> mice and locomotion and  
599 EEG data were assessed.

600

### 601 **Statistical analysis**

602 Statistical analyses were performed in Prism 7 and 8 (Graphpad). For comparisons of  
603 two groups of normally distributed data, unpaired Student t-tests were used; if these  
604 comparisons were before and after treatment of the same animals or cells, paired t-tests  
605 were used instead. For comparisons of two groups of non-normally distributed data,  
606 Mann Whitney U tests were performed, with a Holm-Bonferroni correction, if required  
607 for multiple comparisons. For multiple comparisons of normally distributed data with 2  
608 factors, 2 way ANOVAs were performed (with repeated measures, if applicable),  
609 followed by post-hoc Sidak tests. For multiple comparisons of non-normally distributed  
610 data, Kruskal-Wallis tests were performed with post-hoc Dunn’s tests.

611

612

## 613 References

- 614 1 Allada, R., Emery, P., Takahashi, J. S. & Rosbash, M. Stopping time: the genetics  
615 of fly and mouse circadian clocks. *Annual review of neuroscience* **24**, 1091-1119  
616 (2001).
- 617 2 Mohawk, J. A., Green, C. B. & Takahashi, J. S. Central and peripheral circadian  
618 clocks in mammals. *Annual review of neuroscience* **35**, 445-462 (2012).
- 619 3 Scammell, T. E., Arrigoni, E. & Lipton, J. O. Neural Circuitry of Wakefulness  
620 and Sleep. *Neuron* **93**, 747-765, doi:10.1016/j.neuron.2017.01.014 (2017).
- 621 4 Liu, S. *et al.* WIDE AWAKE mediates the circadian timing of sleep onset.  
622 *Neuron* **82**, 151-166, doi:10.1016/j.neuron.2014.01.040 (2014).
- 623 5 Tabuchi, M. *et al.* Clock-Generated Temporal Codes Determine Synaptic  
624 Plasticity to Control Sleep. *Cell* **175**, 1213-1227 e1218,  
625 doi:10.1016/j.cell.2018.09.016 (2018).
- 626 6 Zhang, S. *et al.* Nmf9 Encodes a Highly Conserved Protein Important to  
627 Neurological Function in Mice and Flies. *PLoS Genet* **11**, e1005344,  
628 doi:10.1371/journal.pgen.1005344 (2015).
- 629 7 Pfaff, D., Ribeiro, A., Matthews, J. & Kow, L. M. Concepts and mechanisms of  
630 generalized central nervous system arousal. *Ann N Y Acad Sci* **1129**, 11-25,  
631 doi:10.1196/annals.1417.019 (2008).
- 632 8 Homanics, G. E. *et al.* Mice devoid of gamma-aminobutyrate type A receptor  
633 beta3 subunit have epilepsy, cleft palate, and hypersensitive behavior.  
634 *Proceedings of the National Academy of Sciences of the United States of America*  
635 **94**, 4143-4148, doi:10.1073/pnas.94.8.4143 (1997).
- 636 9 Glick, S. D., Zimmerberg, B. & Greenstein, S. Individual differences among mice  
637 in normal and amphetamine-enhanced locomotor activity: relationship to  
638 behavioral indices of striatal asymmetry. *Brain research* **105**, 362-364,  
639 doi:10.1016/0006-8993(76)90436-4 (1976).
- 640 10 Tilley, M. R. & Gu, H. H. Dopamine transporter inhibition is required for  
641 cocaine-induced stereotypy. *Neuroreport* **19**, 1137-1140,  
642 doi:10.1097/WNR.0b013e3283063183 (2008).
- 643 11 Bell, B. J., Wang, A. W., Kim, D. W., Blackshaw, S. & Wu, M. N.  
644 Characterization of *mWake* expression in the murine brain. *bioRxiv* doi:  
645 <https://doi.org/10.1101/2020.05.25.114363> (2020).
- 646 12 Bunger, M. K. *et al.* Mop3 is an essential component of the master circadian  
647 pacemaker in mammals. *Cell* **103**, 1009-1017, doi:10.1016/s0092-  
648 8674(00)00205-1 (2000).
- 649 13 Furuta, Y., Lagutin, O., Hogan, B. L. & Oliver, G. C. Retina- and ventral  
650 forebrain-specific Cre recombinase activity in transgenic mice. *Genesis* **26**, 130-  
651 132 (2000).
- 652 14 Chou, T. C. *et al.* Critical role of dorsomedial hypothalamic nucleus in a wide  
653 range of behavioral circadian rhythms. *The Journal of neuroscience : the official*  
654 *journal of the Society for Neuroscience* **23**, 10691-10702 (2003).
- 655 15 Aston-Jones, G., Chen, S., Zhu, Y. & Oshinsky, M. L. A neural circuit for  
656 circadian regulation of arousal. *Nature neuroscience* **4**, 732-738,  
657 doi:10.1038/89522 (2001).
- 658 16 Deurveilher, S. & Semba, K. Indirect projections from the suprachiasmatic  
659 nucleus to major arousal-promoting cell groups in rat: implications for the

- 660 circadian control of behavioural state. *Neuroscience* **130**, 165-183,  
661 doi:10.1016/j.neuroscience.2004.08.030 (2005).
- 662 17 Krashes, M. J. *et al.* Rapid, reversible activation of AgRP neurons drives feeding  
663 behavior in mice. *J Clin Invest* **121**, 1424-1428, doi:10.1172/JCI46229 (2011).
- 664 18 Kim, D. W. *et al.* Single cell RNA-Seq analysis identifies molecular mechanisms  
665 controlling hypothalamic patterning and differentiation. *bioRxiv* doi:  
666 <https://doi.org/10.1101/657148> (2020).
- 667 19 Saper, C. B. & Fuller, P. M. Wake-sleep circuitry: an overview. *Curr Opin*  
668 *Neurobiol* **44**, 186-192, doi:10.1016/j.conb.2017.03.021 (2017).
- 669 20 Eban-Rothschild, A., Appelbaum, L. & de Lecea, L. Neuronal Mechanisms for  
670 Sleep/Wake Regulation and Modulatory Drive. *Neuropsychopharmacology* **43**,  
671 937-952, doi:10.1038/npp.2017.294 (2018).
- 672 21 Jones, B. E. Arousal and sleep circuits. *Neuropsychopharmacology* **45**, 6-20,  
673 doi:10.1038/s41386-019-0444-2 (2020).
- 674 22 Blanco-Centurion, C., Gerashchenko, D. & Shiromani, P. J. Effects of saporin-  
675 induced lesions of three arousal populations on daily levels of sleep and wake.  
676 *The Journal of neuroscience : the official journal of the Society for Neuroscience*  
677 **27**, 14041-14048 (2007).
- 678 23 Tsunematsu, T. *et al.* Acute optogenetic silencing of orexin/hypocretin neurons  
679 induces slow-wave sleep in mice. *J. Neurosci.* **31**, 10529-10539,  
680 doi:10.1523/JNEUROSCI.0784-11.2011 (2011).
- 681 24 Venner, A. *et al.* Reassessing the Role of Histaminergic Tuberomammillary  
682 Neurons in Arousal Control. *The Journal of neuroscience : the official journal of*  
683 *the Society for Neuroscience* **39**, 8929-8939, doi:10.1523/JNEUROSCI.1032-  
684 19.2019 (2019).
- 685 25 Yu, X. *et al.* Genetic lesioning of histamine neurons increases sleep-wake  
686 fragmentation and reveals their contribution to modafinil-induced wakefulness.  
687 *Sleep* **42**, doi:10.1093/sleep/zsz031 (2019).
- 688 26 Carter, M. E. *et al.* Tuning arousal with optogenetic modulation of locus  
689 coeruleus neurons. *Nature neuroscience* **13**, 1526-1533, doi:10.1038/nn.2682  
690 (2010).
- 691 27 Anaclet, C. *et al.* Basal forebrain control of wakefulness and cortical rhythms.  
692 *Nat. Commun.* **6**, 8744, doi:10.1038/ncomms9744 (2015).
- 693 28 Xu, M. *et al.* Basal forebrain circuit for sleep-wake control. *Nature neuroscience*  
694 **18**, 1641-1647, doi:10.1038/nn.4143 (2015).
- 695 29 Herrera, C. G. *et al.* Hypothalamic feedforward inhibition of thalamocortical  
696 network controls arousal and consciousness. *Nature neuroscience* **19**, 290-298,  
697 doi:10.1038/nn.4209 (2016).
- 698 30 Venner, A., Anaclet, C., Broadhurst, R. Y., Saper, C. B. & Fuller, P. M. A Novel  
699 Population of Wake-Promoting GABAergic Neurons in the Ventral Lateral  
700 Hypothalamus. *Curr. Biol.* **26**, 2137-2143, doi:10.1016/j.cub.2016.05.078 (2016).
- 701 31 Kroeger, D. *et al.* Cholinergic, Glutamatergic, and GABAergic Neurons of the  
702 Pedunculopontine Tegmental Nucleus Have Distinct Effects on Sleep/Wake  
703 Behavior in Mice. *J. Neurosci.* **37**, 1352-1366, doi:10.1523/JNEUROSCI.1405-  
704 16.2016 (2017).

- 705 32 Zhu, H. *et al.* Cre-dependent DREADD (Designer Receptors Exclusively  
706 Activated by Designer Drugs) mice. *Genesis* **54**, 439-446, doi:10.1002/dvg.22949  
707 (2016).
- 708 33 Mistlberger, R. E. Circadian regulation of sleep in mammals: role of the  
709 suprachiasmatic nucleus. *Brain Res Brain Res Rev* **49**, 429-454 (2005).
- 710 34 Cheng, M. Y. *et al.* Prokineticin 2 transmits the behavioural circadian rhythm of  
711 the suprachiasmatic nucleus. *Nature* **417**, 405-410, doi:Doi 10.1038/417405a  
712 (2002).
- 713 35 Kramer, A. *et al.* Regulation of daily locomotor activity and sleep by  
714 hypothalamic EGF receptor signaling. *Science* **294**, 2511-2515 (2001).
- 715 36 Kraves, S. & Weitz, C. J. A role for cardiotrophin-like cytokine in the circadian  
716 control of mammalian locomotor activity. *Nature neuroscience* **9**, 212-219,  
717 doi:10.1038/nn1633 (2006).
- 718 37 Pevet, P. & Challet, E. Melatonin: both master clock output and internal time-  
719 giver in the circadian clocks network. *J Physiol Paris* **105**, 170-182,  
720 doi:10.1016/j.jphysparis.2011.07.001 (2011).
- 721 38 Yu, X. *et al.* Circadian factor BMAL1 in histaminergic neurons regulates sleep  
722 architecture. *Current biology : CB* **24**, 2838-2844, doi:10.1016/j.cub.2014.10.019  
723 (2014).
- 724 39 Fuller, P. M., Sherman, D., Pedersen, N. P., Saper, C. B. & Lu, J. Reassessment  
725 of the structural basis of the ascending arousal system. *The Journal of*  
726 *comparative neurology* **519**, 933-956, doi:10.1002/cne.22559 (2011).
- 727 40 Coull, J. T. Neural correlates of attention and arousal: insights from  
728 electrophysiology, functional neuroimaging and psychopharmacology. *Prog*  
729 *Neurobiol* **55**, 343-361, doi:10.1016/s0301-0082(98)00011-2 (1998).
- 730 41 Wu, Y. E., Pan, L., Zuo, Y., Li, X. & Hong, W. Detecting Activated Cell  
731 Populations Using Single-Cell RNA-Seq. *Neuron* **96**, 313-329 e316,  
732 doi:10.1016/j.neuron.2017.09.026 (2017).
- 733 42 Stuart, T. *et al.* Comprehensive Integration of Single-Cell Data. *Cell* **177**, 1888-  
734 1902 e1821, doi:10.1016/j.cell.2019.05.031 (2019).
- 735 43 Lein, E. S. *et al.* Genome-wide atlas of gene expression in the adult mouse brain.  
736 *Nature* **445**, 168-176, doi:10.1038/nature05453 (2007).
- 737 44 Wang, F. *et al.* RNAscope: a novel in situ RNA analysis platform for formalin-  
738 fixed, paraffin-embedded tissues. *J Mol Diagn* **14**, 22-29,  
739 doi:10.1016/j.jmoldx.2011.08.002 (2012).

741

742

743

744



745 **Acknowledgements**

746 We thank A. Meredith and B. McNally for advice on SCN patch-clamp recordings and S.  
747 Hattar for assistance with EEG recordings. We thank B. Hamilton, A. Jackson, A.  
748 McCallion, and Y. Furuta for sharing mouse strains. We thank the Transcriptomics and  
749 Deep Sequencing Core for scRNA sequencing and the Ross Flow Cytometry Core flow  
750 sorting. We thank members of the Wu Lab for discussion. This work was supported by  
751 NIH grants R01NS094571 and R01NS079584. (M.N.W.) and a NINDS Center grant  
752 NS05027 for machine shop work.

753

754 **Author Contributions**

755 B.J.B. and M.N.W. conceived the project, with input from J.Y.C. and S.B. B.J.B.  
756 performed most or all mouse genetics, behavioural experiments, EEG recordings,  
757 expression analyses, viral injections, and rabies tracing. Q.L.\* performed all  
758 electrophysiology and optogenetic experiments and assisted with EEG analyses. D.W.K.  
759 performed scRNA-Seq analysis. S.S.L. performed viral injections and immunostaining.  
760 Q.L. assisted with mouse genetics and generation of the *mWake* allele. I.D.B. assisted  
761 with EEG analyses. A.A.W. and J.L.B. assisted with expression analyses. A.J.C.  
762 assisted with viral injections. H.I. assisted with mouse genetics. B.J.B. and M.N.W.  
763 wrote the manuscript, with feedback from all authors.

764

765

766 **Figure Legends**

767 **Figure 1 | mWAKE inhibits arousal and SCN firing at night**

768 **a**, *mWake* mRNA detected by BaseScope ISH demonstrates expression in the SCN core  
769 (solid and dashed lines denote SCN and core region, respectively). Higher magnification  
770 inset shows representative *mWake* mRNA expression in cells. Scale bar applies to both  
771 images and denotes 200  $\mu\text{m}$  and 50  $\mu\text{m}$  for the entire image and inset, respectively. **b**,  
772 Schematic showing genomic structure of the *mWake* locus and CRISPR/Cas9-mediated  
773 insertion of an in-frame stop codon in exon 4 in the *mWake*<sup>-</sup> mutation. **c**, Relative mRNA  
774 level for *mWake*, determined by qPCR, in *mWake*<sup>(-/-)</sup> vs WT littermate control  
775 hypothalami (normalized to 1.0) (n=3 replicates). **d**, Representative images (of 4  
776 replicates each) of ISH using a digoxigenin-labeled *mWake* RNA probe in the SCN of  
777 *mWake*<sup>(-/-)</sup> vs WT mice. Scale bar denotes 500  $\mu\text{m}$ . **e**, Vigilance state (% per 2 hr bin)  
778 determined by EEG recordings for *mWake*<sup>(-/-)</sup> (n=8) vs WT littermate control (n=6) mice  
779 under DD conditions. “+” and “#” denote  $P < 0.01$  and  $P < 0.001$ , respectively. **f**, Profile of  
780 locomotor activity (defined by beam-breaks) over 24 hrs for *mWake*<sup>(+/+)</sup> (n=19, grey),  
781 *mWake*<sup>(+/-)</sup> (n=22, black), *mWake*<sup>(-/-)</sup> (n=19, red), and *mWake*<sup>(Nmj9/-)</sup> (n=9, cyan) mice  
782 under DD conditions. **g**, Total locomotor activity (total number of beams broken along X  
783 and Y axes) from CT0-12 and CT12-24 from the mice described in (f). **h**, Startle  
784 response ( $V_{\text{avg}}$ ) measured in the first 100 ms following a 100, 110, or 120 dB tone for  
785 *mWake*<sup>(+/+)</sup> (grey, n=10) vs *mWake*<sup>(-/-)</sup> mice (red, n=10) at CT12-14. The average of 5  
786 responses is shown. **i**, Schematic showing genomic structure of the *mWake* locus and  
787 replacement of exon 5 with a *tdTomato-P2A-Cre* cassette in the *mWake*<sup>(Cre)</sup> line. **j**,  
788 Native tdTomato fluorescence in the SCN of a *mWake*<sup>(Cre/+)</sup> mouse (solid and dashed  
789 lines denote SCN and core region, respectively). Scale bar represents 200  $\mu\text{m}$ . **k**,  
790 Representative membrane potential traces from whole-cell patch clamp recordings of  
791 *mWake*<sup>SCN</sup> neurons from *mWake*<sup>(Cre/+)</sup> (grey, top) and *mWake*<sup>(Cre/Cre)</sup> (red, bottom) slices  
792 at ZT0-2 and ZT12-14. **l**, Spontaneous mean firing rate for *mWake*<sup>+</sup> SCN neurons at  
793 ZT0-2 and ZT12-14 from *mWake*<sup>(Cre/+)</sup> (n=21 and n=22) vs *mWake*<sup>(Cre/Cre)</sup> (n=24 and  
794 n=20) mice. **m**, Representative traces of voltage-clamp recordings of *mWake*<sup>SCN</sup> neurons  
795 of *mWake*<sup>(Cre/+)</sup> vs *mWake*<sup>(Cre/Cre)</sup> at ZT12-14. Timing of GABA (1 mM) application is  
796 shown. **n**, GABA-evoked current in *mWake*<sup>SCN</sup> neurons of *mWake*<sup>(Cre/+)</sup> (n=18, grey) vs

797 *mWake*<sup>(Cre/Cre)</sup> (n=20, red) at ZT12-14. For panels (I) and (n), n represents individual  
798 cells from 4 animals for each condition. In this figure and throughout, error bars  
799 represent SEM and “\*”, “\*\*”, and “\*\*\*” denote  $P < 0.05$ ,  $P < 0.01$ , and  $P < 0.001$ ,  
800 respectively.

801

## 802 **Figure 2 | *mWake*<sup>DMH</sup> neurons drive arousal**

803 **a**, *mWake* mRNA detected by Basescope ISH reveals expression in the dorsomedial  
804 hypothalamus (DMH). Dashed lines indicate DMH region, and inset shows  
805 representative *mWake* mRNA expression in cells. Scale bar applies to both images and  
806 denotes 200  $\mu\text{m}$  and 50  $\mu\text{m}$  for the entire image and inset, respectively. **b**, Native  
807 tdTomato fluorescence in the DMH of a *mWake*<sup>(Cre/+)</sup> mouse (dashed lines denote DMH  
808 region). Scale bar represents 200  $\mu\text{m}$ . **c**, Representative membrane potential traces from  
809 whole-cell patch clamp recordings of *mWake*<sup>DMH</sup> neurons in *mWake*<sup>(Cre/+)</sup> (grey, top) and  
810 *mWake*<sup>(Cre/Cre)</sup> (red, bottom) slices at ZT0-2 and ZT12-14. **d**, Spontaneous mean firing  
811 rate for *mWake*<sup>DMH</sup> neurons at ZT0-2 and ZT12-14 from *mWake*<sup>(Cre/+)</sup> (n=19 and n=14) vs  
812 *mWake*<sup>(Cre/Cre)</sup> (n=16 and n=12) mice. n represents individual cells from  $\geq 4$  animals. **e**,  
813 Schematic showing bilateral injections of AAV viral vector containing Cre-recombinase  
814 and eGFP (AAV-Cre), or eGFP alone (AAV-Sham) into the DMH of *mWake*<sup>(flox/flox)</sup>  
815 mice. **f**, Representative image of eGFP fluorescence expression in the DMH following  
816 AAV-Cre injection described in (e). Scale bar denotes 200  $\mu\text{m}$ . **g**, Total locomotor  
817 activity (total number of beams broken along X and Y axis) during CT0-4 vs CT12-16  
818 under DD conditions for *mWake*<sup>(flox/flox)</sup> mice before (“pre”, grey) and after (“post”, green)  
819 DMH injection of AAV-Sham (n=6) or AAV-Cre (n=9). **h**, Schematic showing bilateral  
820 injections of AAV-DIO-DREADD-Gq into the DMH of *mWake*<sup>(Cre/+)</sup> mice. **i**,  
821 Representative image of mCherry fluorescence expression in the DMH of *mWake*<sup>(Cre/+)</sup>  
822 following AAV-DIO-DREADD-Gq injection described in (h). Scale bar denotes 200  
823  $\mu\text{m}$ . **j**, Total locomotor activity (total number of beams broken along X and Y axis) of  
824 *mWake*<sup>(Cre/+)</sup> mice with bilateral injections of AAV-DIO-DREADD-Gq into the DMH in  
825 the 4 hrs following IP injection of vehicle vs CNO (1 mg/kg) at CT 8 (n=6). **k**,  
826 Representative short-time Fourier transform spectrograms of 8 hrs of recorded EEG  
827 activity, starting after IP injection at ZT6 of vehicle alone (above) or 1 mg/kg CNO

828 (below), from *mWake*<sup>(Cre/+)</sup> mice injected with AAV-DIO-DREADD-Gq bilaterally into  
829 the DMH. Power density is represented by the color-scheme and deconvoluted by  
830 frequency on the y-axis, over time on the x-axis. **I**, Amount of wakefulness derived from  
831 EEG plotted as % time in 1 hr bins following IP injection of vehicle (grey) or 1 mg/kg  
832 CNO (red) (n=4) at ZT6. “3v” denotes third ventricle.

833

834 **Figure 3 | Characterization of *mWake*<sup>DMH</sup> neurons and their interaction with**  
835 **neuromodulatory systems**

836 **a**, UMAP (Uniform Manifold Approximation and Projection) plot showing distribution  
837 of *mWake*<sup>+</sup> neurons across hypothalamic nuclei, as determined by single-cell expression  
838 profiling. 11 clusters are defined, for SCN, DMH, POA (pre-optic area), TMN  
839 (tuberomammillary nucleus), ZI (zona incerta), and VMH (ventromedial hypothalamus)  
840 regions. “Gal<sup>+</sup>” and “Cck<sup>+</sup>” refer to Galanin<sup>+</sup> and Cholecystokinin<sup>+</sup>. **b**, Bar graph  
841 showing proportions of GABAergic and glutamatergic *mWake*<sup>+</sup> neurons for each scRNA-  
842 Seq neuronal cluster. **c**, Bar graph showing distribution of expression for norepinephrine,  
843 dopamine, acetylcholine, histamine and orexin receptors identified in DMH *mWake*<sup>+</sup>  
844 neurons (cluster 4). **d**, Schematic showing patch-clamp recordings of *mWake*<sup>DMH</sup> neurons  
845 from *mWake*<sup>(Cre/+)</sup> mice, following application of norepinephrine, orexin, or  
846 acetylcholine. **e**, Representative membrane potential traces from recordings described in  
847 (**d**) following administration of norepinephrine (top, red), orexin (middle, green), or  
848 acetylcholine (bottom, blue) in the presence of synaptic blockers at ZT12-14. **f**,  
849 Spontaneous mean firing rate of *mWake*<sup>DMH</sup> neurons following application of 100 μM  
850 norepinephrine (n=23 and 12 cells), 300 nM orexin-A (n=8 and 7 cells), or 1 mM  
851 acetylcholine chloride (n=8 and 10 cells) at ZT12-14 in the absence (“- blockers”) or  
852 presence (“+ blockers”) of 20 μM CNQX, 50 μM AP5, and 10 μM picrotoxin. The  
853 neurons recorded in **f** were derived from 3-6 animals. **g**, Schematic showing AAV-DIO-  
854 hChR2 injected into the DMH of *mWake*<sup>(Cre/+);TH-GFP</sup> mice unilaterally, and whole-cell  
855 patch clamp recordings of *NE*<sup>LC</sup> neurons, following 480 nm blue-light stimulation. **h** and  
856 **i**, Representative excitatory post-synaptic currents (EPSCs) (**h**) or action potentials (APs)  
857 (**i**) from *NE*<sup>LC</sup> neurons, triggered by optogenetic stimulation of *mWake*<sup>DMH</sup> neuron  
858 terminals at 5 Hz. Blue lines indicate timing of blue-light pulses. **j**, Fidelity (%) of *NE*<sup>LC</sup>

859 neuron EPSCs (dark blue) and APs (light blue) triggered by optogenetic stimulation of  
860 *mWake<sup>DMH</sup>* neuron terminals. A total of 7 *NE<sup>LC</sup>* cells from 3 independent virally-injected  
861 *mWake<sup>(Cre/+)</sup>;TH-GFP* mice were recorded, of which 4 exhibited optogenetically-  
862 triggered responses.

863

#### 864 **Figure 4 | mWAKE defines a network critical for arousal**

865 **a**, Jitter plot showing behavioural classification of arousal level for *mWake<sup>(Cre/+)</sup>; LSL-Gi*  
866 mice 90 min following injection of vehicle or 0.3 mg/kg CNO (n=12) at ZT12. **b**, Startle  
867 response (Vmax) measured in the first 100 ms following a 120 dB tone for *mWake<sup>(Cre/+)</sup>;*  
868 *LSL-Gi* mice 2 hr following injection of vehicle (grey) or 0.3 mg/kg CNO (magenta)  
869 (n=5) at CT12-14. **c**, Representative short-time Fourier transform spectrograms of 12 hrs  
870 of recorded EEG activity from *mWake<sup>(Cre/+)</sup>; LSL-Gi* mice after IP injection at ZT10 of  
871 vehicle alone (above) or 0.3 mg/kg CNO (below). **d**, Representative EEG traces for a 30  
872 s window (above) and short-time Fourier transform spectrograms (below) starting 150  
873 mins after injection of vehicle (left) or 0.3 mg/kg CNO (right) at ZT10. The dashed red  
874 box indicates the time window used for spectral and amplitude analysis in **(e)** and **(f)**. **e**,  
875 Welch's power spectral density estimates as a percentage of total EEG power across 10  
876 min, averaged across multiple EEG traces. *mWake<sup>(Cre/+)</sup>; LSL-Gi* injected with vehicle  
877 (grey) or 0.3 mg/kg CNO (magenta) (n=4). Inset shows a plot of delta-band power as a  
878 percentage of total EEG power. **f**, EEG trace amplitude (plotted as normalized root mean  
879 square (RMS)) for the animals described in **(e)**.

880

#### 881 **Extended Data Figure 1 | Circadian and EEG-related phenotypes of *mWake* mutant** 882 **mice**

883 **a**, Schematic showing domain structure of mWAKE in mice and humans, compared to  
884 *Drosophila* WAKE. Percentage similarity of mouse and human mWAKE, compared to  
885 fly WAKE is shown. **b**, Representative double-plotted actograms of wheel running  
886 activity for *mWake<sup>(+/+)</sup>* (left) vs *mWake<sup>(-/-)</sup>* mice (right), covering 14 days of LD then 14  
887 days of free-running in DD. Activity plotted as number of wheel revolutions in 10 min  
888 bins. **c**, Locomotor period length ( $\tau$ ) during the DD period for *mWake<sup>(+/+)</sup>* (n=8) and  
889 *mWake<sup>(-/-)</sup>* (n=8) mice. **d**, Vigilance state (% per 2 hr bin) determined by EEG recordings

890 for *mWake*<sup>(-/-)</sup> (n=8) vs WT littermate control (n=6) mice under LD conditions. The mice  
891 in panel (d) are the same as in Fig. 1e. e, Hypnograms (*top*) and short-time Fourier  
892 transform spectrograms (*bottom*) over 24 hrs in DD showing example of prolonged wake  
893 bout in *mWake*<sup>(-/-)</sup> mice, compared to *mWake*<sup>(+/+)</sup> control. Power density is represented  
894 by the color-scheme and deconvoluted by frequency on the y-axis, over time on the x-  
895 axis. f, Wakefulness bout length distribution over a 24 hr period expressed as a % of  
896 total wakefulness, for *mWake*<sup>(+/+)</sup> vs *mWake*<sup>(-/-)</sup> mice. Dashed line highlights the presence  
897 of >6 hr continuous bouts of wakefulness, which are observed in some *mWake*<sup>(-/-)</sup>  
898 mutants and never in controls.

899

## 900 **Extended Data Figure 2 | *mWake* mutants are hyperactive at night**

901 a, Schematic of the beam-break arena used to measure locomotion, with infrared red  
902 beams forming a grid spaced at 0.5 inch intervals across the floor of the cage. b, Profile  
903 of locomotor activity (defined by beam breaks) over 24 hrs for *mWake*<sup>(+/+)</sup> (n=19, grey),  
904 *mWake*<sup>(-/-)</sup> (n=19, red), and *mWake*<sup>(Nmf9<sup>-/-</sup>)</sup> (n=10, cyan) mice under LD conditions. c,  
905 Total locomotor activity (total number of beams broken along X and Y axes) from the  
906 mice in (b) at CT0-12 and CT12-24. Note that these data are from the same mice as in  
907 Fig. 1f. d, Startle response (V<sub>avg</sub>) following a 100, 110, or 120 dB tone for *mWake*<sup>(+/+)</sup>  
908 (grey, n=10) vs *mWake*<sup>(-/-)</sup> mice (red, n=10) at CT0-2. Note that these data are from the  
909 same mice as in Fig. 1h. e and g, Distance (cm) traveled in five min bins in an open-field  
910 test, across 3 hrs of the trial (CT0-CT3, e) or (CT12-CT15, g) for *mWake*<sup>(+/+)</sup> (n=8, grey)  
911 vs *mWake*<sup>(-/-)</sup> (n=8, red) mice. Data were collected from 3 independent trials. f and h,  
912 Habituation of animals shown in (e) and (g), respectively, as assessed by total distance  
913 (cm) traveled in the first 30 mins vs the last 30 mins of the trial. i, Locomotor activity  
914 profile over 24 hrs for *mWake*<sup>(Cre/+)</sup> (n=9, grey) and *mWake*<sup>(Cre/Cre)</sup> (n=10, red) under DD  
915 conditions. j, Total locomotor activity (total number of beams broken along X and Y  
916 axes) from the mice in (i) at CT0-12 vs CT12-24.

917

## 918 **Extended Data Figure 3 | mWAKE inhibits the activity of SCN neurons at night**

919 a, Schematic of whole-cell patch-clamp recordings from *mWake*<sup>+</sup> neurons (tdTomato<sup>+</sup>  
920 neurons in *mWake*<sup>(Cre/+)</sup> or *mWake*<sup>(Cre/Cre)</sup> mice), in the core region of the SCN (*top*).  
921 Representative images of a biocytin- and tdTomato-labeled cell post-recording (*bottom*).

922 Scale bar denotes 25  $\mu\text{m}$ . **b** and **c**, *f-I* curves for *mWake*<sup>+</sup> SCN neurons from *mWake*<sup>(Cre/+)</sup>  
923 vs *mWake*<sup>(Cre/Cre)</sup> mice at ZT0-2 (n=21 and 19) (**b**) or ZT12-14 (n=19 and 13) (**c**). **d**,  
924 Representative traces of voltage-clamp recordings of *mWake*<sup>+</sup> SCN neurons of  
925 *mWake*<sup>(Cre/+)</sup>; *Bmal1*<sup>(+/+)</sup> (grey) vs *mWake*<sup>(Cre/+)</sup>; *Bmal1*<sup>(-/-)</sup> (yellow) at ZT12-14. Timing  
926 of GABA (1 mM) application is shown. **e**, GABA-evoked current in *mWake*<sup>SCN</sup> neurons  
927 from *mWake*<sup>(Cre/+)</sup>; *Bmal1*<sup>(+/+)</sup> (n=24) or *mWake*<sup>(Cre/+)</sup>; *Bmal1*<sup>(-/-)</sup> (n=26) mice at ZT12-14.  
928 n represents individual cells from 4 animals.

929

### 930 **Extended Data Figure 4 | Loss of mWAKE in SCN does not cause hyperactivity**

931 **a**, Schematic of the genomic structure of the *mWake* locus and insertion of *loxP* sites  
932 flanking exons 4 and 5 in the *mWake*<sup>(floxed)</sup> allele. **b** and **d**, Locomotor activity profile over  
933 24 hrs for *mWake*<sup>(floxed/-)</sup> (n=5, grey) and *Six3*<sup>(Cre/+)</sup>; *mWake*<sup>(floxed/-)</sup> (n=6, green) under LD (**b**)  
934 or DD (**d**) conditions. **c** and **e**, Total locomotor activity from the mice in (**b**) at ZT0-12  
935 and ZT12-24 or (**d**) at CT0-12 and CT12-24.

936

### 937 **Extended Data Figure 5 | *mWake*<sup>+</sup> DMH neurons promote arousal**

938 **a**, Schematic of whole-cell patch-clamp recordings from *mWake*<sup>+</sup> neurons (tdTomato<sup>+</sup>  
939 neurons in *mWake*<sup>(Cre/+)</sup> or *mWake*<sup>(Cre/Cre)</sup> mice), in the DMH region (top). Representative  
940 images of a biocytin- and tdTomato-labeled cell post-recording (bottom). Scale bar  
941 denotes 25  $\mu\text{m}$ . **b** and **c**, *f-I* curves for *mWake*<sup>DMH</sup> neurons from *mWake*<sup>(Cre/+)</sup> vs  
942 *mWake*<sup>(Cre/Cre)</sup> mice at ZT0-2 (n=11 and 11, Day) (**b**) or ZT12-14 (n=8 and 8, Night) (**c**).  
943 n represent individual cells from 4 animals. **d** and **e**, NREM (**d**) and REM sleep (**e**) (%  
944 per hr bin) for *mWake*<sup>(Cre/+)</sup> mice with AAV-DIO-DREADD-Gq injected bilaterally into  
945 the DMH, following IP injection of vehicle (grey) or 1 mg/kg CNO (magenta) at ZT6.  
946 Note these are data are from the same mice as in Fig. 21. **f**, Total locomotor activity (total  
947 number of beams broken along X and Y axes) of *mWake*<sup>(Cre/+)</sup> mice with bilateral  
948 injections of AAV-DIO-DREADD-Gi into the DMH in the 4 hrs following IP injection  
949 of vehicle (grey) vs CNO (1 mg/kg, magenta) (n=4) at ZT10. **g**, Representative short-  
950 time Fourier transform spectrograms of 4 hrs of recorded EEG activity, starting after IP  
951 injection of vehicle alone (above) or 3 mg/kg CNO (below) at ZT10, from *mWake*<sup>(Cre/+)</sup>  
952 mice injected with AAV-DIO-DREADD-Gi bilaterally into the DMH. **h-j**, Wakefulness  
953 (**h**), NREM (**i**), and REM (**j**) amount for the mice described in (**g**), plotted as % time in 1

954 hr bins following IP injection of vehicle (grey) or 3 mg/kg CNO (magenta) (n=4) at  
955 ZT10. **k**, total locomotor activity (total number of beams broken along X and Y axes) of  
956 *mWake*<sup>(Cre/+)</sup> mice with sham injections into the DMH in the 4 hrs following IP injection  
957 of vehicle (grey), CNO (1 mg/kg, cyan), or CNO (3 mg/kg, magenta) (n=3) at ZT6. **l**,  
958 Vigilance state (%) of 2 hrs of recorded EEG activity, starting after IP injection of vehicle  
959 alone, 1 mg/kg CNO, or 3 mg/kg CNO at ZT6, from the mice described in (**k**).

960

961 **Extended Data Figure 6 | Additional data related to single cell RNA sequencing**

962 **a**, UMAP plot showing distribution of *mWake*<sup>+</sup> cells in individual scRNA-Seq libraries  
963 and distribution of *mWake*<sup>+</sup> neurons and ependymal cells. **b**, Violin plot showing  
964 distribution of number and mean (black dot) of genes (top) and total mRNAs (bottom,  
965 calculated by the number of unique molecular identifiers (UMIs)) in individual scRNA-  
966 Seq libraries. **c**, Heatmap showing key marker genes that were used to identify spatial  
967 location of each *mWake*<sup>+</sup> neuronal cluster. **d-g**, Representative images of FISH  
968 experiments using RNAscope probes against *tdTomato*, *Vglut2*, and/or *Vgat* mRNA in  
969 the DMH (**d** and **e**) and SCN (**f** and **g**) of *mWake*<sup>(Cre/+)</sup> mice. Nuclei counterstained with  
970 DAPI. Scale bars denote 200  $\mu$ m in **d** and **f** and 20  $\mu$ m in **e** and **g**.

971

972 **Extended Data Figure 7 | Additional data related to neuromodulatory input to**

973 *mWake*<sup>DMH</sup> neurons

974 **a**, Schematic showing dual injections of the Cre-dependent rabies helper virus (AAV-  
975 FLEX-G) and the rabies- $\Delta$ G-BFP (RabV- $\Delta$ G-BFP) virus into the DMH of *mWake*<sup>(Cre/+)</sup>  
976 mice. **b-e**, Representative images of BFP fluorescence and anti-histamine decarboxylase  
977 (HDC) (**b**), anti-Orexin A (OxA) (**c**), anti-choline acetyltransferase (CHAT) (**d**), or anti-  
978 tyrosine hydroxylase (TH) (**e**), as well as merged images from TMN (**b**), lateral  
979 hypothalamus (LH) (**c**), BF (**d**), or LC (**e**) regions, from the mice described in (**a**). Scale  
980 bar denotes 20  $\mu$ m in (**b**), 50  $\mu$ m in (**c**), 20  $\mu$ m in (**d**), 20  $\mu$ m in (**e**). **f**, Schematic showing  
981 patch-clamp recordings of *mWake*<sup>DMH</sup> neurons from *mWake*<sup>(Cre/+)</sup> mice, following  
982 application of histamine. **g**, Representative membrane potential traces from the  
983 recordings described in (**f**) in the presence of synaptic blockers at ZT12-14. **h**,  
984 Spontaneous mean firing rate of *mWake*<sup>DMH</sup> neurons following application of 20  $\mu$ M



985 histamine (n=8 and 9 cells) at ZT12-14 in the absence (“- blockers”) or presence (“+  
986 blockers”) of 20  $\mu$ M CNQX, 50  $\mu$ M AP5, and 10  $\mu$ M picrotoxin. The neurons recorded  
987 from in **(h)** were derived from 3 animals. **i**, Schematic showing unilateral stereotaxic  
988 injection of AAV-viral vector expressing Cre-dependent eGFP (AAV-FLEX-eGFP) into  
989 the DMH of *mWake*<sup>(Cre/+)</sup> mice. **j**, Representative sagittal section showing broad  
990 projection of GFP fluorescence following injection of AAV-FLEX-eGFP shown in **(e)**.  
991 Dashed ellipse denotes injection site, and locations of the basal forebrain (BF), cortex  
992 (Cx), hypothalamus (Hyp), locus coeruleus (LC), and pons are noted. Scale bar denotes 1  
993 mm.

994

### 995 **Extended Data Figure 8 | The mWAKE network is critical for arousal**

996 **a**, Representative images of anti-HA labeling of cells and processes expressing LSL-  
997 DREADD-Gi, tdTomato fluorescence from *mWake*<sup>+</sup> cells, or merged images in  
998 representative brain regions from *mWake*<sup>(Cre/+)</sup>; *LSL-DREADD-Gi* mice. Sections  
999 containing suprachiasmatic nucleus (SCN), basal forebrain (BF), and cortex (Cx) are  
1000 shown. Scale bar denotes 100  $\mu$ m for SCN, 20  $\mu$ m for BF, and 100  $\mu$ m for Cx panels.  
1001 **b,c**, Two additional short-time Fourier transform spectrograms of 12 hrs of recorded EEG  
1002 activity from *mWake*<sup>(Cre/+)</sup>; *LSL-Gi* mice after IP injection at ZT10 of vehicle alone  
1003 (above) or 0.3 mg/kg CNO (below). These panels illustrate the range of EEG phenotypes  
1004 observed. **d**, Jitter plot showing behavioural classification of arousal level for *HDC*<sup>(Cre/+)</sup>;  
1005 *LSL-Gi* mice following injection of vehicle or 1 mg/kg CNO (n=4). **e**, Representative  
1006 short-time Fourier transform spectrograms of 12 hrs of recorded EEG activity from  
1007 *HDC*<sup>(Cre/+)</sup>; *LSL-Gi* mice after IP injection at ZT10 of vehicle alone (above) or 1 mg/kg  
1008 CNO (below). **f**, Short-time Fourier transform spectrograms for a *HDC*<sup>(Cre/+)</sup>; *LSL-Gi*  
1009 mouse starting 150 mins after injection of vehicle (left) or 1 mg/kg CNO (right) at ZT10.  
1010 The dashed red box indicates the time window used for spectral and amplitude analysis in  
1011 **(g)** and **(h)**. **g**, Welch’s power spectral density estimates as a percentage of total EEG  
1012 power across 10 min, averaged across multiple EEG traces. *HDC*<sup>(Cre/+)</sup>; *LSL-Gi* injected  
1013 with vehicle (grey) or 1 mg/kg CNO (green) (n=3). Inset shows a plot of delta-band  
1014 power as a percentage of total EEG power. **h**, EEG trace amplitude (plotted as  
1015 normalized root mean square (RMS)) for the animals described in **(f)**.

1016

1017 **Supplementary Table 1 | Additional electrophysiological properties for *mWake*<sup>SCN</sup>**  
1018 **and *mWake*<sup>DMH</sup> neurons.**

1019

1020 **Supplementary Table 2 | Stereotaxic coordinates and viruses injected**

1021

1022 **Supplementary Table 3 | List of differentially expressed genes in *mWake*<sup>+</sup> neurons**

1023

1024 **Supplementary Video 1 | *mWake* KO exhibit nighttime hyperactivity and circling.**

1025 **(0:00 – 0:15)**, A single *mWake*<sup>(-/-)</sup> mouse exhibiting elevated homecage locomotor

1026 activity, compared to heterozygote littermates. **(0:15 – 0:19)**, *mWake*<sup>(-/-)</sup> mouse

1027 demonstrating rapid (~1.6 Hz) tight circling behavior. **(0:20 – 0:31)**, Two

1028 *mWake*<sup>(-/-)</sup> mice display broad circling activity (~1.4 Hz). Video speed is not adjusted.

1029

1030 **Supplementary Video 2 | *mWake*<sup>(-/-)</sup> mice are not impaired in the forced-swim assay.**

1031 **(0:00 – 0:40)**, Representative trial of forced swim assay for a control (“Wild Type”)

1032 mouse. **(0:40 – 1:22)**, Representative trial of forced swim assay for a *mWake*<sup>(-/-)</sup>

1033 (“*mWake*-KO”) mouse. **(1:22 – 2:08)**, Representative trial of forced swim assay of

1034 *mWake*<sup>(NMF9<sup>-/-</sup>)</sup> (“*NMF9/mWake*-KO”) mouse. All animals were allowed to swim for ≥ 30

1035 s before being removed.

1036

1037 **Supplementary Video 3 | Chemogenetic inhibition of *mWake*<sup>+</sup> network induces**

1038 **profound reduction in arousal.**

1039 **(0:00 – 0:35)**, *mWake*<sup>(Cre/+);LSL-Gi</sup> mouse (“Vehicle”) 90 min after injection of vehicle

1040 solution, classified as “Normal,” exhibiting normal spontaneous locomotion and

1041 exploration, as well as avoidance of paper object. **(0:36 – 1:10)**, *mWake*<sup>(Cre/+);LSL-Gi</sup>

1042 mouse (“CNO#1”) 90 min after injection of 0.3 mg/kg CNO solution, classified as

1043 “Reduced Reactivity,” displaying markedly decreased spontaneous locomotion, with

1044 intact righting reflex and reduced avoidance of paper object. **(1:11 – 1:40)**,

1045 *mWake*<sup>(Cre/+);LSL-Gi</sup> mouse (“CNO#2”) 90 min after injection of 0.3 mg/kg CNO

1046 solution, classified as “Stuporous,” with absent spontaneous locomotion, slow righting

1047 reflex, and minimal responsiveness to paper object.

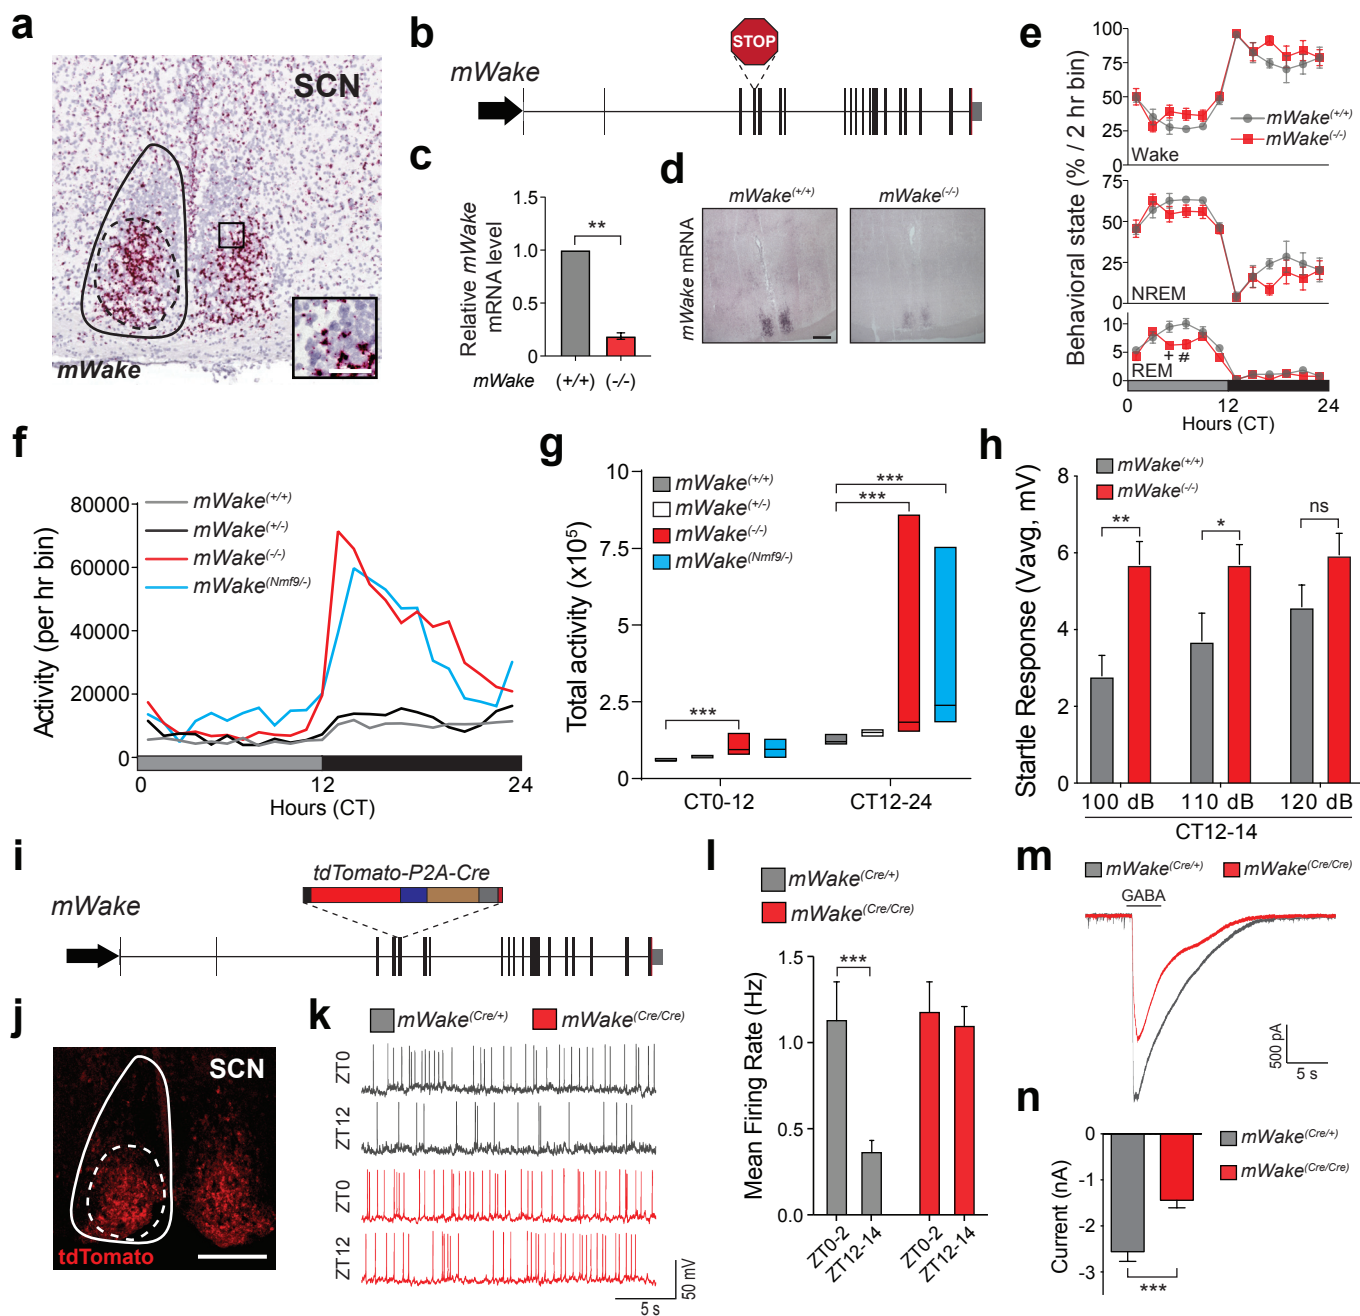

Figure 1

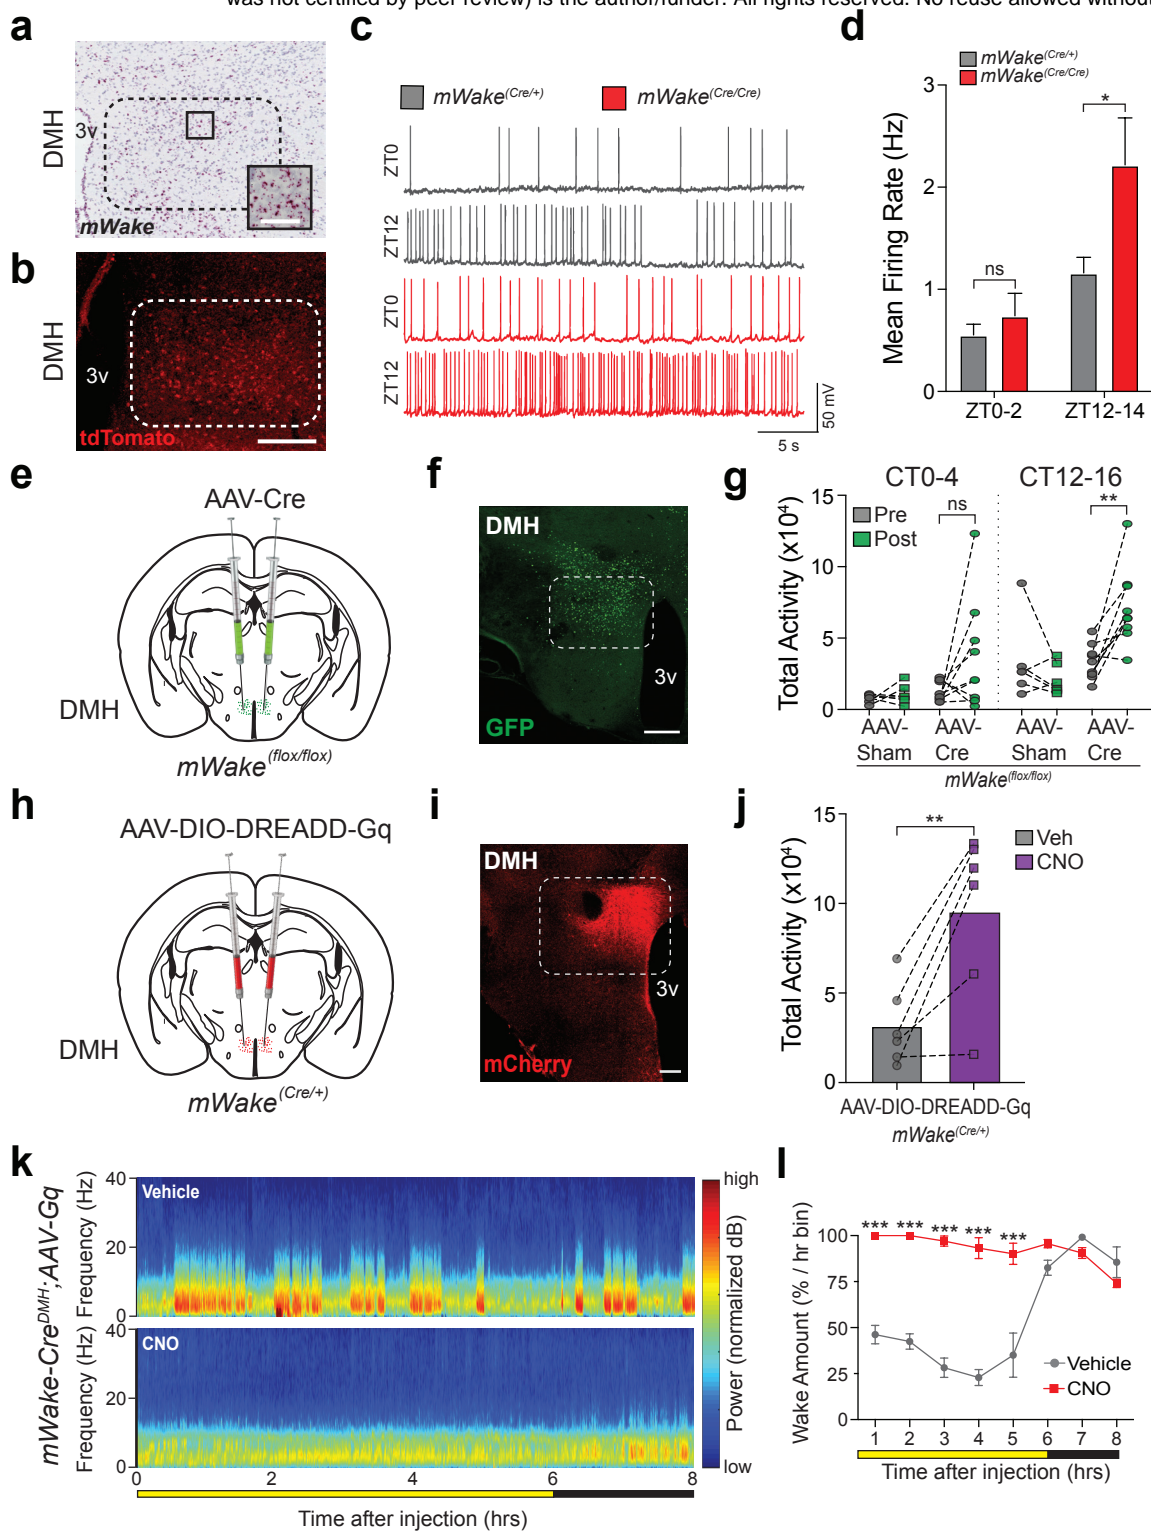

Figure 2

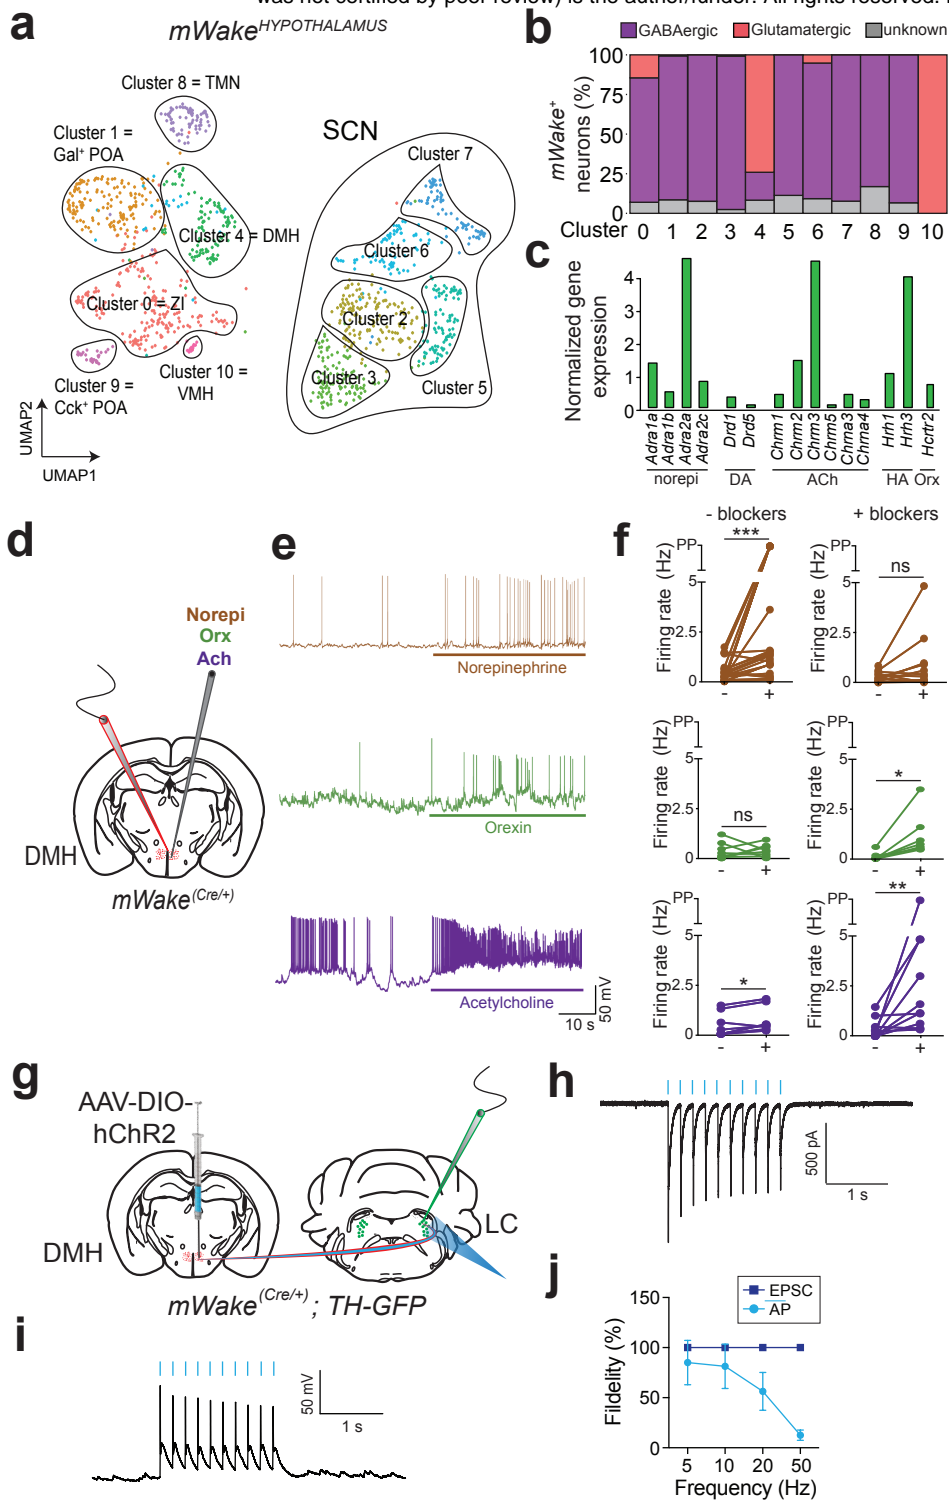

Figure 3

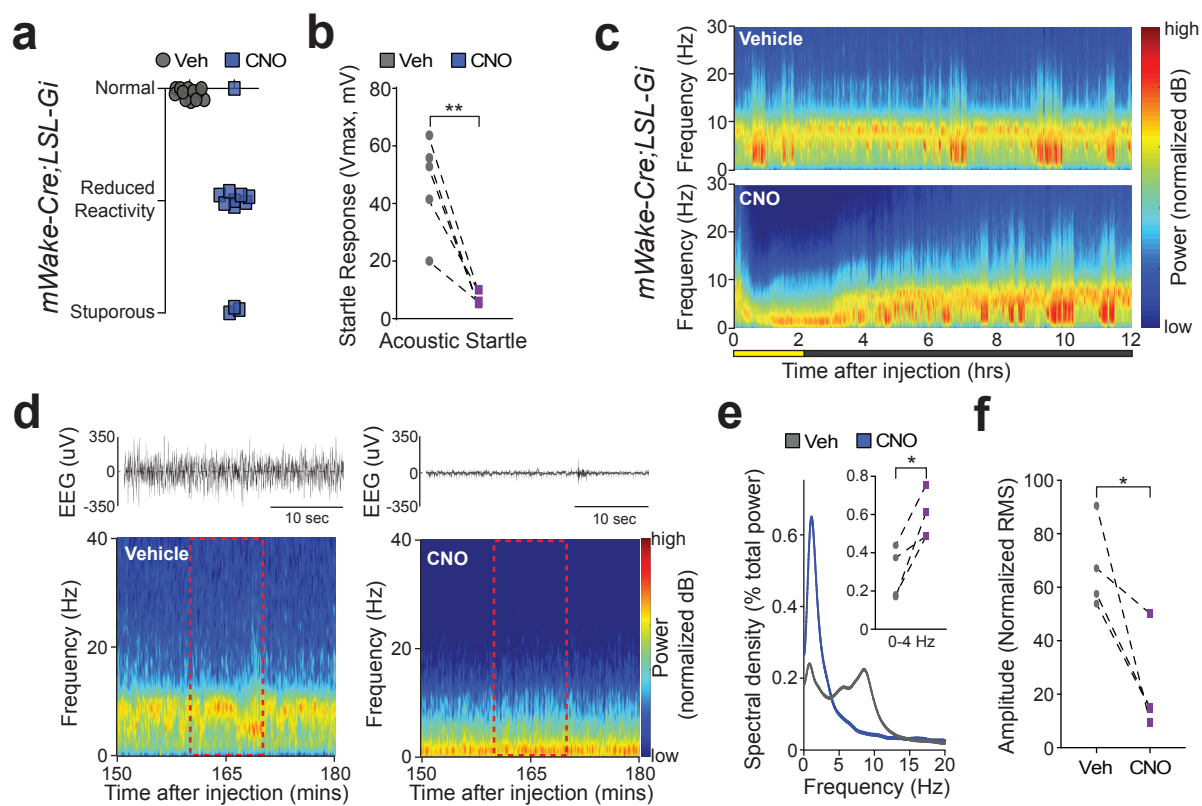

Figure 4

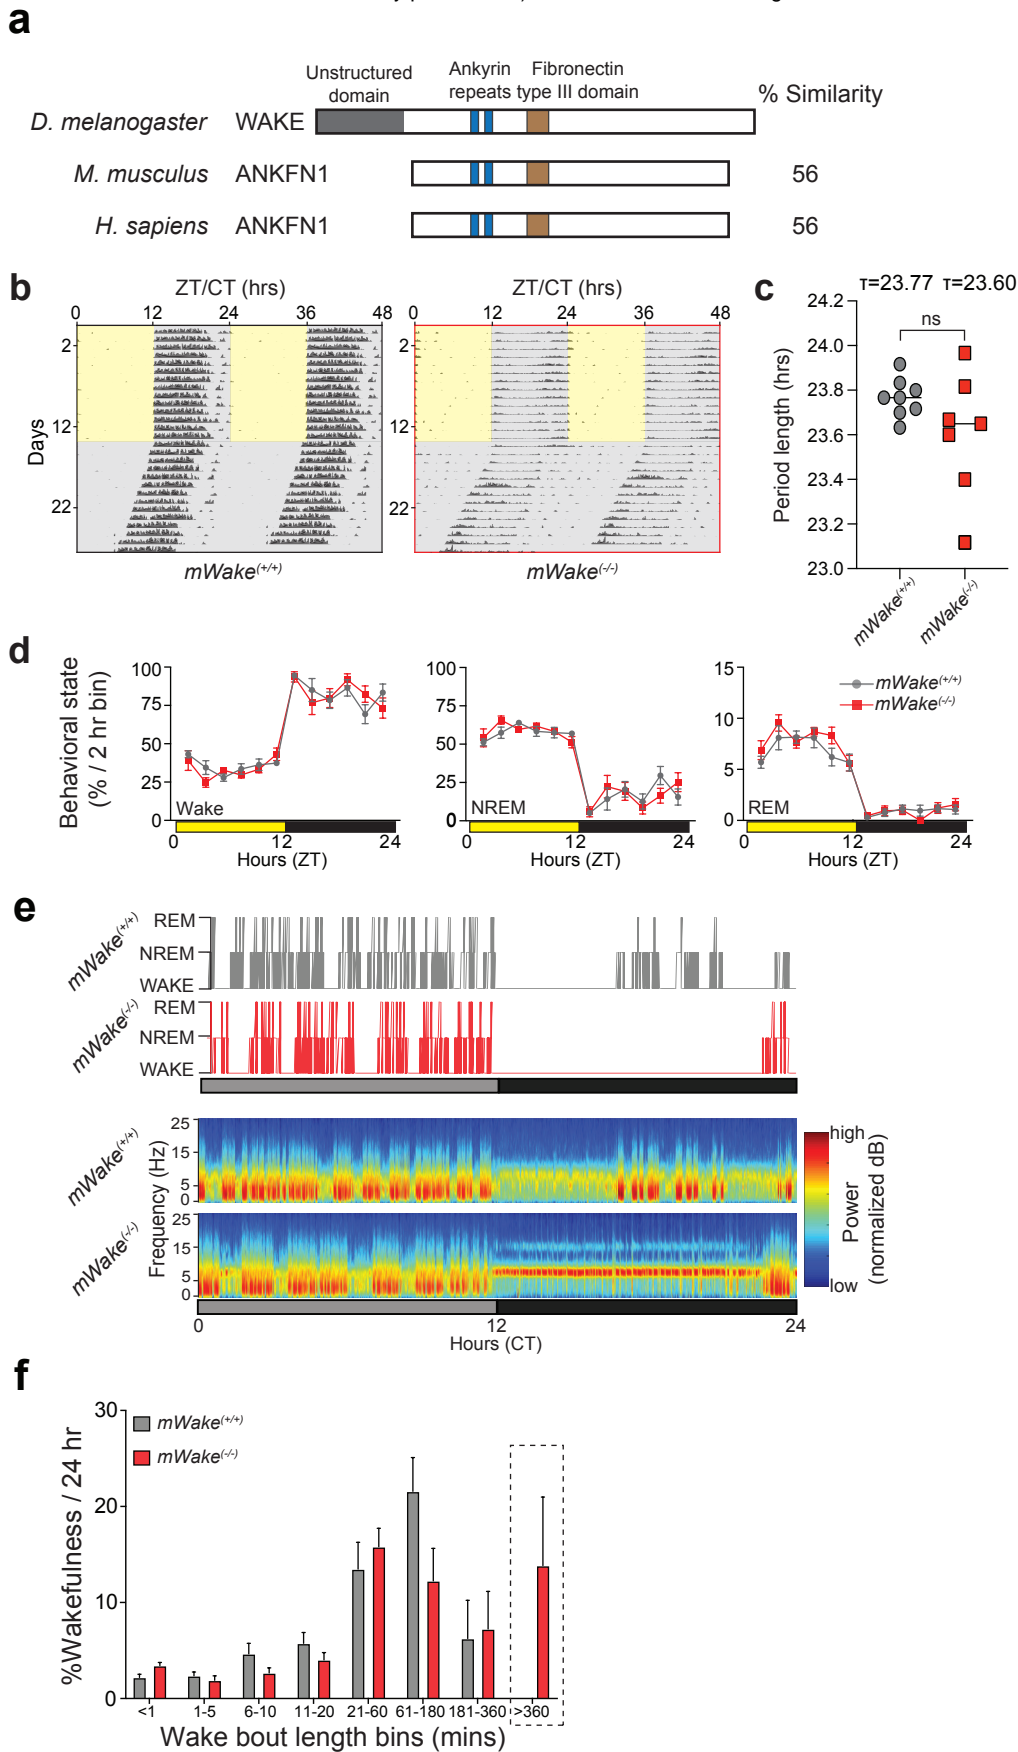

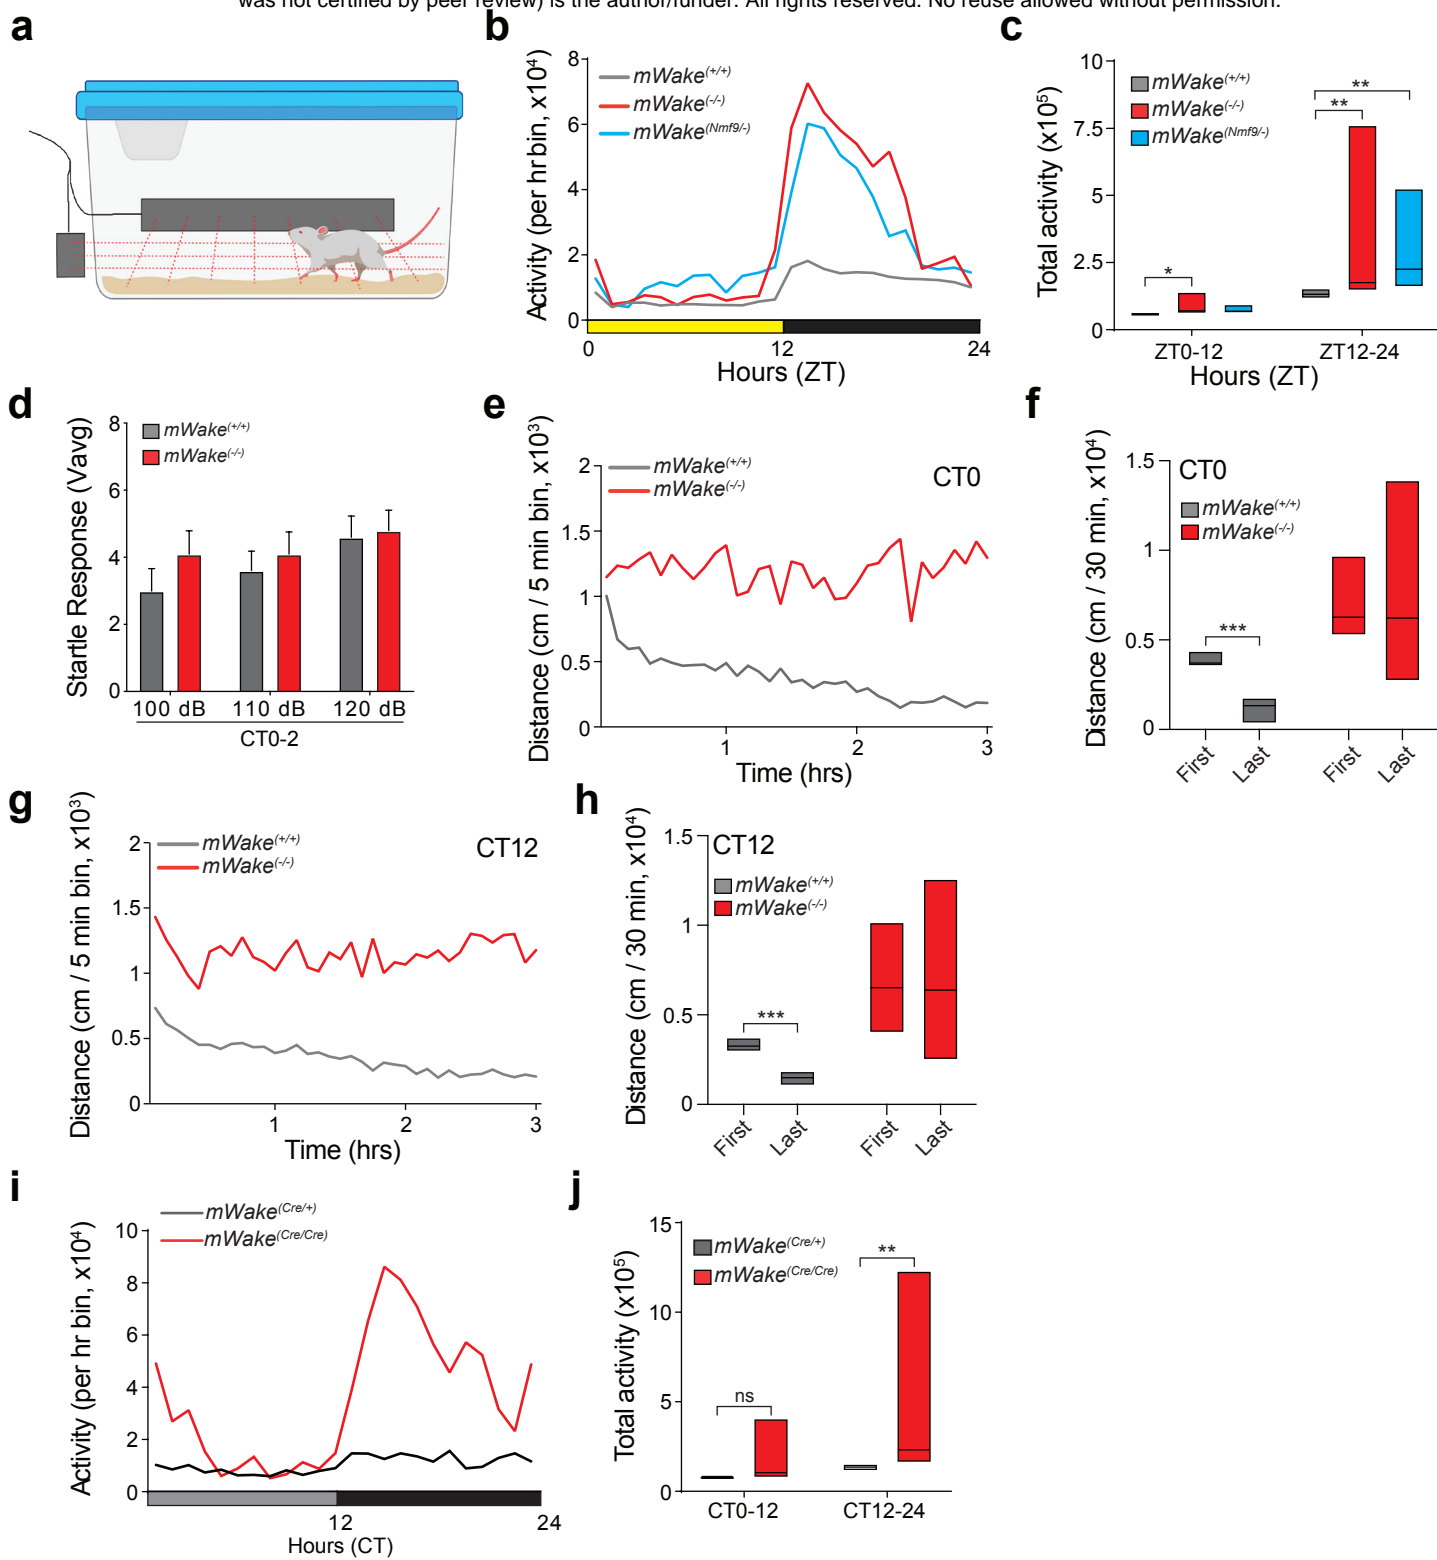



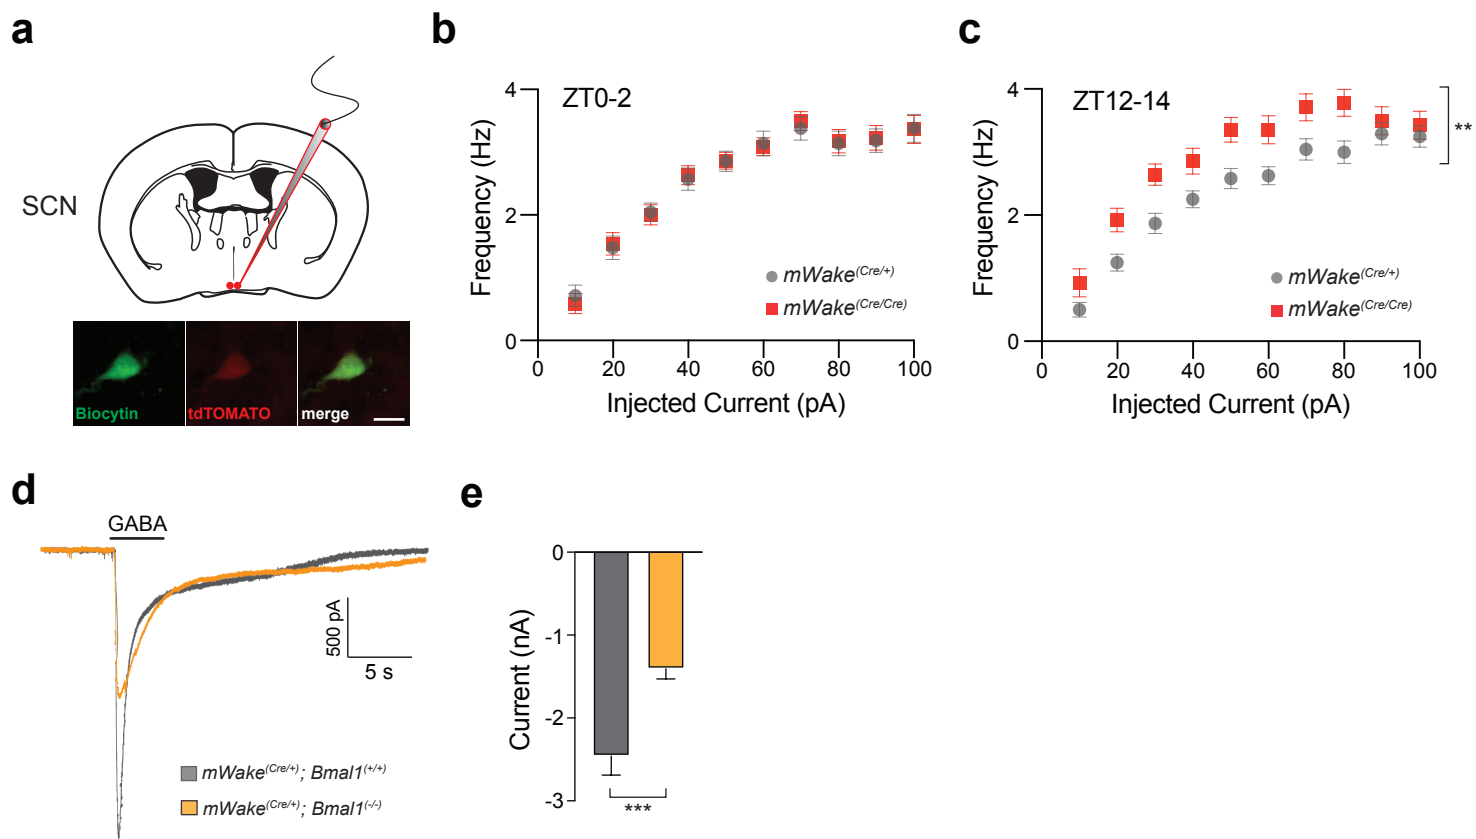

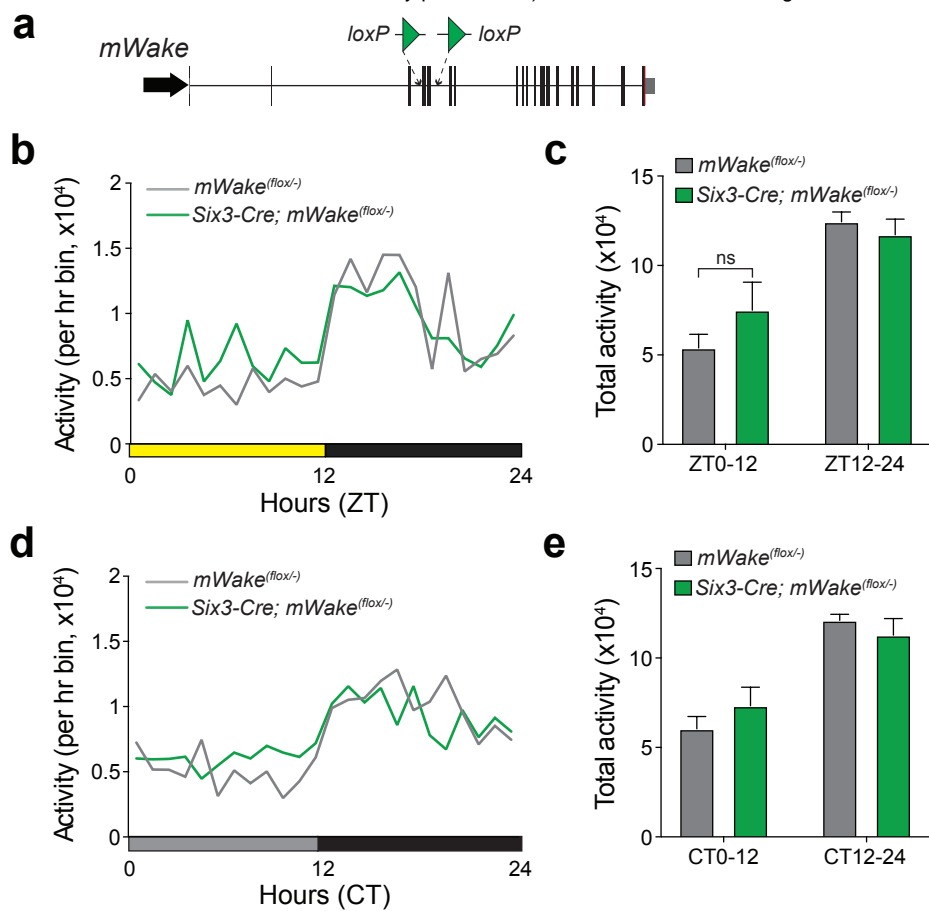

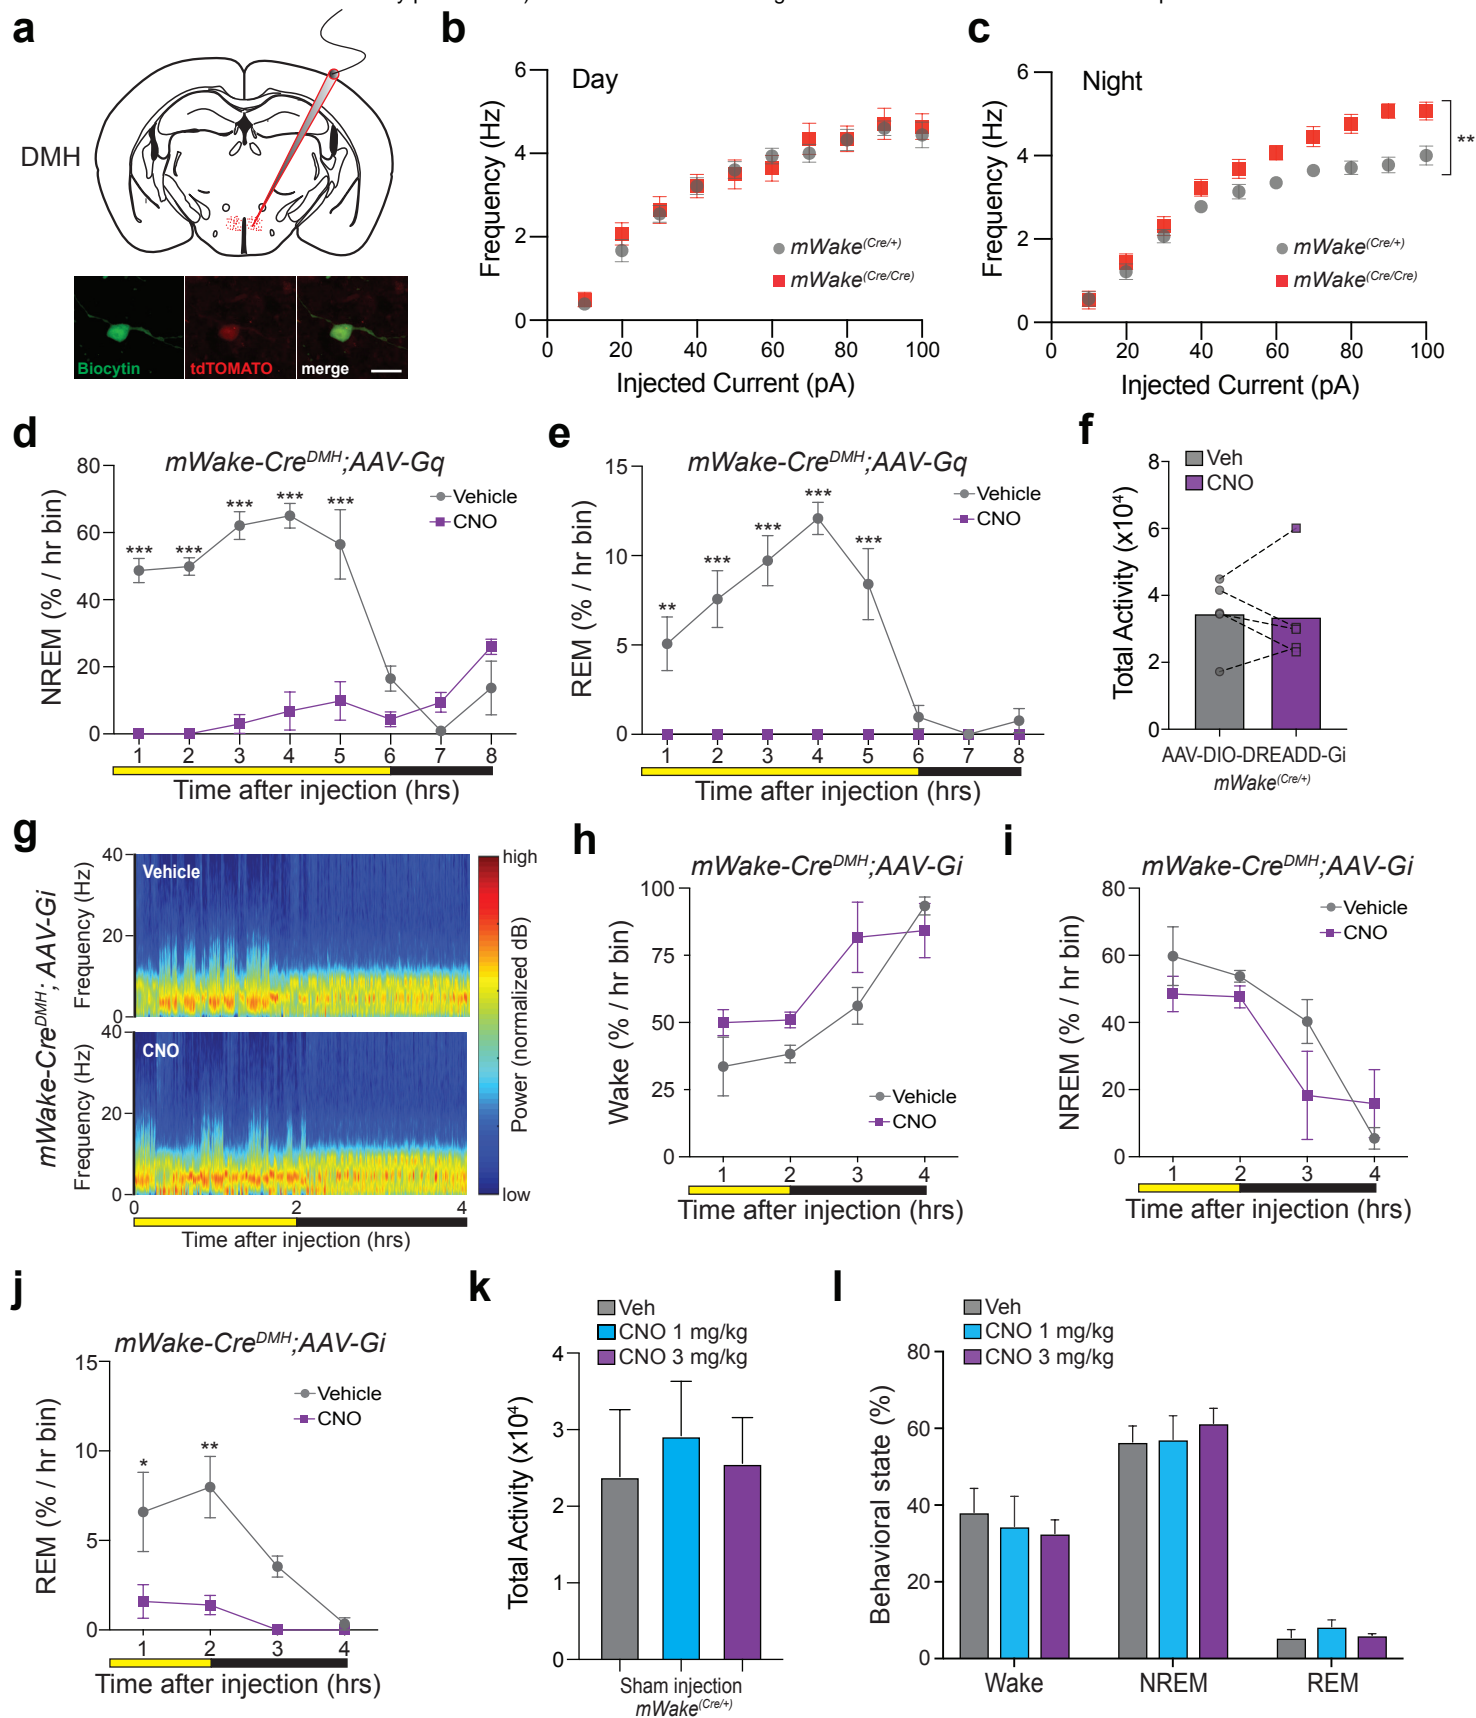

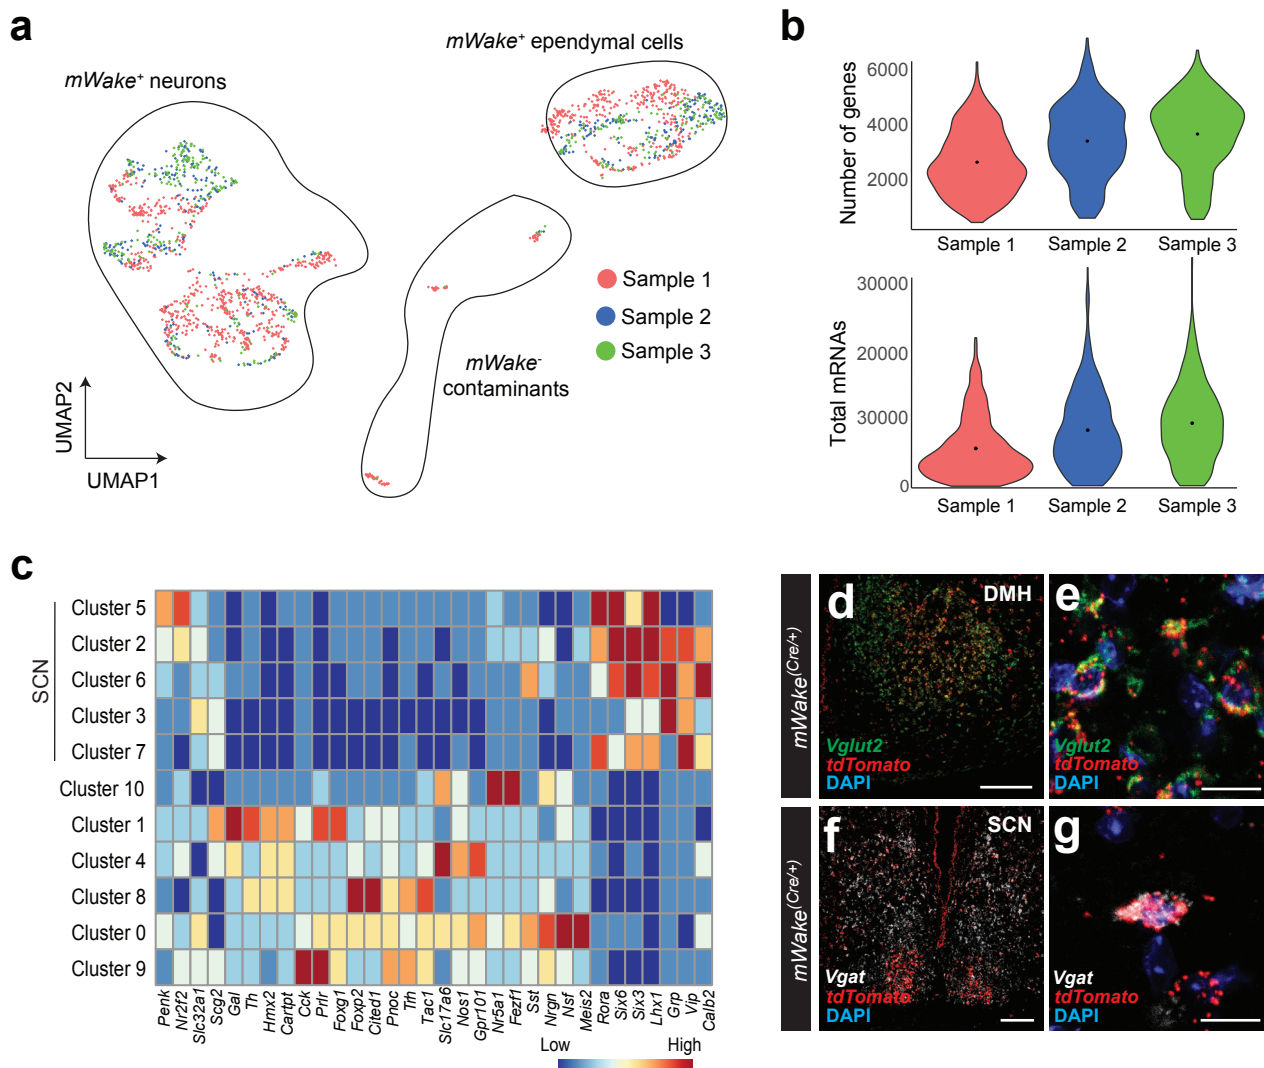

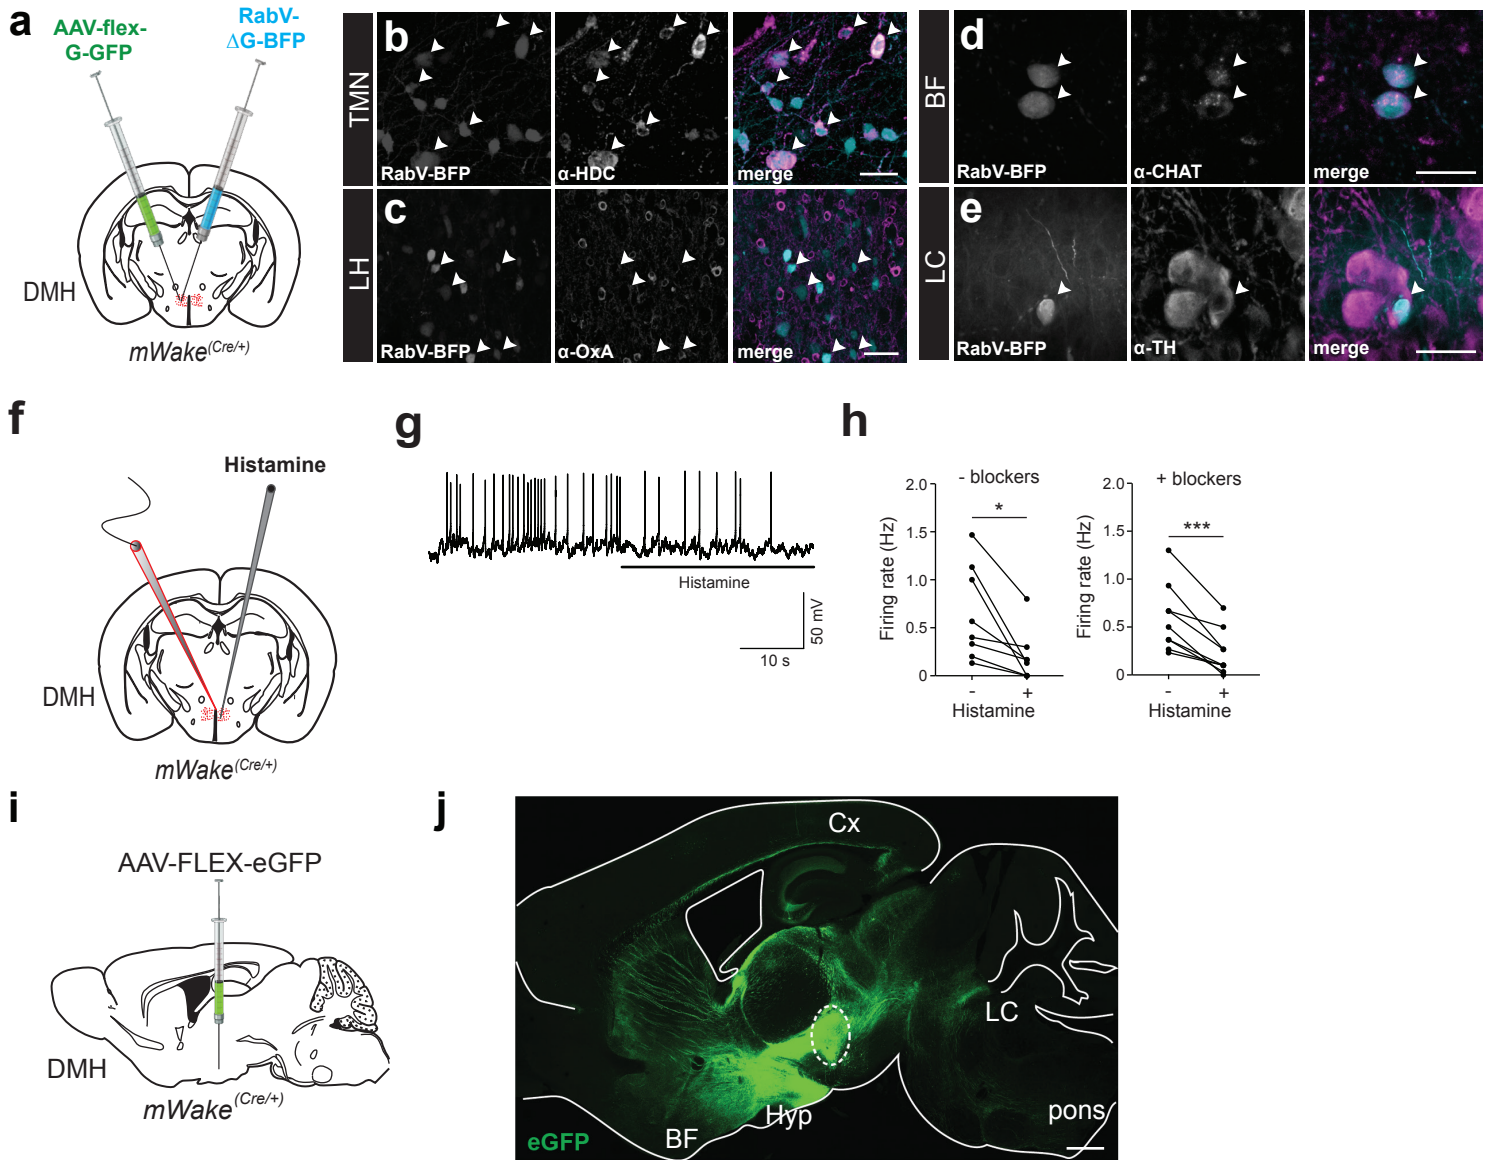

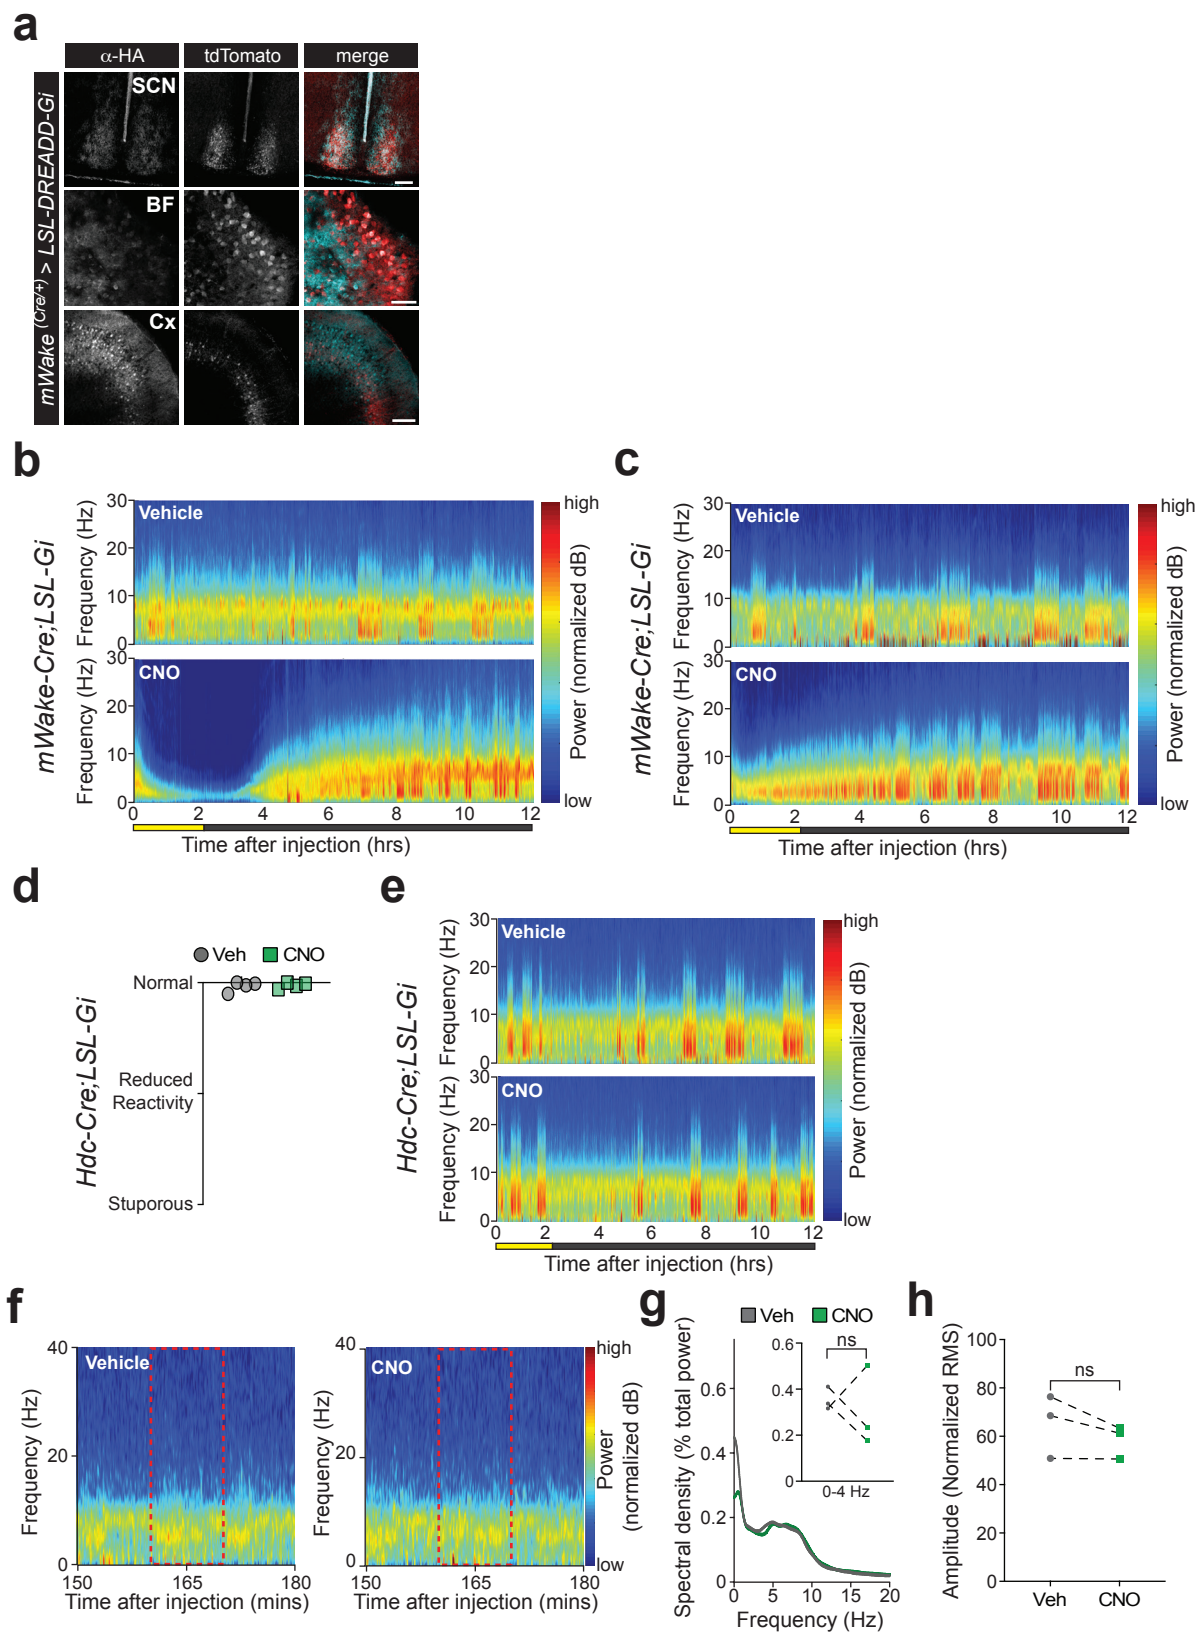

Source: https://www.biorxiv.org/content/10.1101/2020.03.12.989921v2.full.pdf
